1                                   **Epigenetic regulation of genome integrity by a prion-based mechanism**

2  
3                                   James S. Byers<sup>1</sup>, David M. Garcia<sup>2</sup>, and Daniel F. Jarosz<sup>1,2,\*</sup>

4  
5  
6  
7  
8  
9  
10  
11  
12  
13  
14  
15  
16  
17  
18  
19  
20  
21  
22  
23  
24  
25  
26  
27  
28  
29  
30  
31  
32  
33  
34  
35  
36  
37  
38  
39  
40

**Affiliations:**

41  
42 <sup>1</sup>Department of Developmental Biology, Stanford University School of Medicine, 269 Campus Drive,  
43 Stanford, CA 94305

44  
45 <sup>2</sup>Department of Chemical and Systems Biology, Stanford University School of Medicine, 269 Campus  
46 Drive, Stanford, CA 94305

47  
48 \*To whom correspondence should be addressed: jarosz@stanford.edu

49 **ABSTRACT**

50

51 Epigenetic mechanisms mediate diverse gene expression programs in growth and development. Yet

52 whether any can permanently alter the genome is unknown. Here we report a protein-based epigenetic

53 element, a prion, formed by the conserved DNA helicase Mph1/FANCM. [*MPH1*<sup>+</sup>] provides resistance to

54 DNA damage, a gain-of-function trait that requires helicase activity and interactions with other DNA

55 repair proteins. Strikingly, the intrinsically disordered regions of Mph1 and human FANCM that are

56 required for prion phenotypes do not resemble known prions. [*MPH1*<sup>+</sup>] reduces mitotic mutation rates,

57 but promotes meiotic crossovers, driving phenotypic diversification in wild outcrosses. Remarkably,

58 [*MPH1*<sup>+</sup>] is induced by stresses in which the prion is beneficial. Thus, [*MPH1*<sup>+</sup>] fuels a quasi-Lamarckian

59 form of inheritance that promotes survival of the current generation and diversification of the next.

60

61 **INTRODUCTION**

62 All organisms must faithfully transmit a genetic blueprint comprising  $\sim 10^6$  to  $\sim 10^9$  base pairs to the next  
63 generation. This challenge is met by an ancient cohort of proteins that orchestrate error-free replication  
64 and DNA repair (Whitby, 2010). Many such activities are organized by a helicase known as Mph1  
65 (mutator phenotype 1) in fungi and FANCM (Fanconi Anemia complementation group M) in animals and  
66 plants (Crismani et al., 2012; Moldovan and D'Andrea, 2009). Mph1/FANCM also drives diverse  
67 biochemical activities including DNA-dependent ATPase function, replication fork reversal, and D loop  
68 dissociation (Whitby, 2010). In humans, mutations in FANCM are associated with Bloom's syndrome and  
69 elevated cancer rates, underscoring its central importance in ensuring genome integrity (Alter, 1996;  
70 Meetei et al., 2003). A hallmark of Fanconi anemia patients is extreme sensitivity to chemotherapeutics  
71 that create DNA inter-strand crosslinks or double strand breaks (DSBs) (Moldovan and D'Andrea, 2009).  
72 In nature DSBs arise commonly during sexual reproduction, where they serve as intermediates for  
73 meiotic recombination, but vastly exceed the number of crossovers in most organisms (McMahill et al.,  
74 2007). Recent studies in *Arabidopsis thaliana* and *Schizosaccharomyces pombe* suggest that, by  
75 suppressing crossover events, Mph1/FANCM provides a molecular explanation for this imbalance  
76 (Crismani et al., 2012; Lorenz et al., 2012).

77         Here we report that Mph1 has the capacity to act as protein-based epigenetic element, a prion,  
78 that we term  $[MPH1^+]$  (brackets denote non-Mendelian meiotic segregation; capitalization denotes  
79 dominance).  $[MPH1^+]$  is adaptive during genotoxic stress. It also exerts a strong influence on genome  
80 fidelity, decreasing mutagenesis in mitotic growth while increasing the frequency with which DSBs are  
81 resolved as crossovers during sexual reproduction.  $[MPH1^+]$  can be induced by the same stresses to  
82 which it provides resistance, providing a molecular mechanism for quasi-Lamarckian inheritance. Our  
83 data thus establish  $[MPH1^+]$  as an inducible epigenetic state that simultaneously guards the genome

84 against insult during mitotic division and promotes its permanent and heritable diversification during  
85 meiosis.

86

## 87 **Methods**

88 **Yeast Techniques.** Yeast strains (Table S1) were obtained from stock centers or generously provided by  
89 the sources indicated. All strains were stored as glycerol stocks at  $-80^{\circ}\text{C}$  and revived on YPD before  
90 testing. Yeast were grown in YPD at  $30^{\circ}\text{C}$  unless indicated otherwise. Yeast transformation was  
91 performed with a standard lithium–acetate protocol (Gietz et al., 1992).

92 For yeast crossing experiments, MATa and MAT $\alpha$  mating types each lacking a unique  
93 auxotrophic marker were mixed overnight in YPD. This mixture was then plated on plates selecting for  
94 these 2 auxotrophies to select for diploids (usually minus lysine and minus methionine). After 3 days,  
95 colonies were picked and grown in 8 mLs pre-sporulation media (8 g Yeast Extract, 3 g Bacto Peptone,  
96 100 g Dextrose, 100 mg adenine sulfate per liter) overnight. The next morning, the cells were washed  
97 and resuspended in 3 mLs sporulation media (10 g potassium acetate, 1 g yeast extract, 0.5 g glucose,  
98 0.1 g amino acid add-back per liter). Cells were incubated for 7 days at room temperature and spores  
99 were enriched as described previously (Rockmill et al., 1991).

100 Cytoduction experiments were performed as described previously (Chakrabortee et al., 2016).  
101 Briefly, initial BY4742 recipient strains generated by transformation introducing a defective KAR allele  
102 (*kar1-15*) that prevents nuclear fusion during mating (Wickner et al., 2006). Strains were made ‘petite’  
103 (incompetent for mitochondrial respiration) by inoculating a single colony in YPD with 0.25% ethidium  
104 bromide and growing culture at  $30^{\circ}\text{C}$  until late exponential/stationary phase ( $\text{OD}_{600} \sim 1$ ). Cultures were  
105 diluted 1:1000 into fresh YPD with ethidium bromide and the previous steps were repeated twice.  
106 Cultures were plated to single colonies and multiple were tested for respiration incompetence (i.e. no  
107 growth on YP-Glycerol). For initial cytoduction into BY4742, donor BY4741 strains harboring [*MPH1*<sup>+</sup>]

108 and naïve BY4742 *kar1-15* recipient strains were mixed on the surface of a YPD agar plate. These were  
109 grown for 24 hours and transferred to media lacking methionine and containing glycerol as a carbon  
110 source (SGly-MET). This selects for both BY4742 nuclear markers along with restoration of functional  
111 mitochondria via cytoplasmic exchange. After 3-5 days, multiple single colonies were picked and  
112 passaged with another round of selection on SD-MET. In parallel, these colonies were confirmed to be  
113 haploid by passage on SD-LYS-MET medium. For reverse cytoductions, the new donor strains (this time  
114 the successful BY4742 *kar1-15* cytoductants) were mixed with petite naïve BY4741 cells (generated as  
115 above) on YPD agar. Cytoductions were repeated as described previously except selecting for BY4741  
116 recipient nuclear markers on glycerol media lacking lysine (SGly-LYS). Multiple cytoductants were picked  
117 and tested for the presence of [*MPH1*<sup>+</sup>] phenotypes.

118  
119 **Phenotypic assays.** Biological replicates of each yeast strain (BY4741 MATa haploids) were pre-grown in  
120 rich media (YPD). We then diluted these saturated cultures 1:10 in sterile water and then inoculated 1.5  
121 µL into 96-well plates with 150 µL of YPD (SD-CSM was used instead with cisplatin and mitomycin C) per  
122 well with the following stressors: phleomycin 5µg/mL; mycophenolic Acid – 20 µM; hydroxyurea – 400  
123 mM; 4-nitroquinoline 1-oxide – 1.2 µM; cisplatin – 8 mM; methyl methanesulfonate – 0.012%;  
124 camptothecin –50 µM; doxorubicin – 80 µM; oxolinic acid – 100 µM; mitomycin C – 1mM. We grew cells  
125 at 30 °C in humidified chambers for 96 h and continuously measured growth by OD<sub>600</sub> in a microplate  
126 reader. Timepoints plotted in bar graphs correspond to the point of greatest difference between [*mph1*<sup>-</sup>  
127 ] and [*MPH1*<sup>+</sup>]: phleomycin – 1225 min; mycophenolic Acid – 755 min; hydroxyurea – 2500 min; 4-  
128 nitroquinoline 1-oxide – 2500 min; methyl methanesulfonate – 1600 min; camptothecin – 900 min;  
129 doxorubicin – 2000 min; oxolinic acid – 755 min; mitomycin C – 2500 min.

130 For genetic interaction experiments, phenotyping was performed similarly to before but instead  
131 in 384-well plates to generate additional technical replicates for each strain. Briefly, biological replicates

132 of each knockout were pre-grown in rich media (YPD) in 96-well plates. We did not analyze mutants of  
133 two additional interacting proteins, Rfa1 and Smc5, which were associated with strong sporulation  
134 defects unrelated to the prion (Farmer et al., 2011; Soustelle et al., 2002)). We then diluted these  
135 saturated cultures 1:10 in sterile water and then inoculated 5  $\mu$ L in a 1:4 array into 384-well plates with  
136 45  $\mu$ L of YPD+4-NQO per well. However, because each genetic knockout was differentially sensitive to  
137 genotoxic stress, different concentrations of the chemical were used for each genotype: *rad5 $\Delta$*  – 2  $\mu$ M;  
138 *rad51 $\Delta$*  – 1.5  $\mu$ M; *sgs1 $\Delta$*  – 1  $\mu$ M; *srs2 $\Delta$*  – 2  $\mu$ M; *mhf1 $\Delta$*  – 1.5  $\mu$ M; *mhf2 $\Delta$*  – 2  $\mu$ M; *chl1 $\Delta$*  – 2  $\mu$ M; *exo1 $\Delta$*  –  
139 1.5  $\mu$ M; *mgm101 $\Delta$*  – 1  $\mu$ M; *msh2 $\Delta$*  – 1  $\mu$ M; *msh6 $\Delta$*  – 2  $\mu$ M; *pso2 $\Delta$*  – 1.5  $\mu$ M; *slx4 $\Delta$*  – 2  $\mu$ M. We grew cells  
140 at 30 °C in humidified chambers for 96 h and continuously measured growth by OD<sub>600</sub> in a microplate  
141 reader. The Log<sub>2</sub> fold-change values plotted correspond to the highest OD<sub>600</sub> value reached for each  
142 strain (i.e. the carrying capacity). The same concentrations were used for the phenotyping of the  
143 corresponding heterozygous, cross-back diploids.

144  
145 **Microscopy.** Microscopy was performed using a Leica inverted fluorescence microscope with a  
146 Hamamatsu Orca 4.0 camera. Cells were imaged after growth to exponential phase (OD<sub>600</sub> of 0.7) or  
147 stationary phase (OD 1.5 or above after 2 days) in a medium that minimizes autofluorescence (per liter  
148 in water: 6.7 g yeast nitrogen base without ammonium sulfate, 5 g casamino acids, 20 g glucose).  
149 Exposure time was 2 seconds.

150  
151 **Protein Transformation.** Lysate transformations were performed as described previously (Chakrabortee  
152 et al., 2016; Tanaka and Weissman, 2006). Briefly, 50 mL cultures of [*MPH1*<sup>+</sup>] strains were grown in YPD  
153 for 18 h, pelleted, washed twice with H<sub>2</sub>O and 1 M sorbitol respectively, and then resuspended in 200  $\mu$ L  
154 of SCE buffer (1 M sorbitol, 10 mM EDTA, 10 mM DTT, 100mM sodium citrate, 1 Roche mini-EDTA-free  
155 protease inhibitor tablet per 50 mL, pH 5.8) containing 50 units/mL of zymolyase 100T. Cells were

156 incubated for 30 min at 35°C, sonicated on ice for 10 s with a sonic dismembrator at 20% intensity, and  
157 cell debris was removed via centrifugation at 10,000g at 4°C X 15 min. Supernatants were digested with  
158 3-fold excess RNase I and biotinylated DNase (as determined by units of activity) (Thermo AM1906) for  
159 1 h at 37°C. DNase was subsequently removed by adding saturating quantities of streptavidin-sepharose  
160 beads, incubating for 5 min, and bead pelleting via centrifugation (this allows addition of a *URA3*-  
161 marked plasmid for selection later). Nuclease digested supernatants were used to transform naïve  
162 recipient yeast spheroplasts. Cells were harvested as before, re-suspended in 200 U/mL zymolyase 100T  
163 in 1 M sorbitol, and incubated at 35°C for 15 min. Spheroplasts were collected by centrifugation, and  
164 washed twice with 1 mL sorbitol and 1 mL STC buffer (1 M sorbitol, 10 mM CaCl<sub>2</sub>, 10 mM Tris pH 7.5)  
165 respectively, and re-suspended in STC buffer using wide-mouthed pipet tips to avoid lysis. Aliquots of  
166 spheroplasts were transformed with 50 µL of lysate, 20 µL salmon sperm DNA (2 mg/mL), and 5 µL of a  
167 carrier plasmid (*URA3*- and GFP-expressing pAG426-GFP). Spheroplasts were incubated in  
168 transformation mix for 30 min at room temperature, collected via centrifugation, and resuspended in  
169 150 µL of SOS-buffer (1 M sorbitol, 7 mM CaCl<sub>2</sub>, 0.25% yeast extract, 0.5% bacto-peptone). Spheroplasts  
170 were recovered at 30°C for 30 min and the entire culture was plated on SD-URA plates and overlaid with  
171 warm SD-CSM containing 0.8% agar. After 2-3 days, dozens of Ura<sup>+</sup> colonies were picked and re-  
172 streaked on SD-URA selective media. The carrier plasmid was subsequently removed by section on 5-  
173 FOA and single colonies were tested for the transmission of [*MPH1*<sup>+</sup>]-dependent phenotypes. Infectivity  
174 is calculated as percent of transmission divided by the amount of seeded protein used (estimate 77  
175 molecules/cell of Mph1) (Kulak et al., 2014).

176  
177 **Mutagenesis assays.** Yeast strains were grown in multiple biological replicates to saturation in YPD.  
178 Then 1 mL was spun down, resuspended in 100 µL H<sub>2</sub>O, and plated on SD-Arg (6.7 g yeast nitrogen base  
179 without ammonium sulfate, 5 g casamino acids without arginine, 20 g glucose per liter) + 60 µg/mL

180 Canavanine (forward mutagenesis), YPD + 100  $\mu$ M Fluconazole, or 60  $\mu$ g/mL Canavanine and 1 g/L 5-  
181 Fluoroorotic acid (GCR mutagenesis). Plates were incubated for 3 days and then CFUs were counted  
182 using a colony counter (Synbiosis Acolyte).

183

184 **Induced mutagenesis and prion switching assays.** Yeast strains (BY4741 or *MDG1::K.lactisURA3*  
185 reporter strains) were grown with 3 biological replicates to saturation in YPD with the indicated  
186 chemicals for induced mutagenesis frequencies (0.012% MMS, 100  $\mu$ M Oxolinic Acid) or for [*MPH1*<sup>+</sup>]  
187 reporter switching (2.4  $\mu$ M 4-NQO, 400  $\mu$ M Camptothecin, 2 mM Cisplatin, 0.024% H<sub>2</sub>O<sub>2</sub>, 400 mM  
188 Hydroxyurea, 0.012% MMS). For starvation conditions in [*MPH1*<sup>+</sup>] reporter switching, yeast strains were  
189 grown with 3 biological replicates to saturation in YPD and then washed once with water and  
190 resuspended in the following media conditions (no glucose, nitrogen limitation, phosphate limitation,  
191 and sporulation media). Then 1 mL was spun down, resuspended in 100  $\mu$ L H<sub>2</sub>O, and plated on the  
192 indicated selective plates: SD-Arg (6.7 g yeast nitrogen base without ammonium sulfate, 5 g casamino  
193 acids without arginine, 20 g glucose per liter) + 60  $\mu$ g/mL Canavanine (forward mutagenesis) or SD-URA  
194 (50 mg uracil, 6.7 g yeast nitrogen base without ammonium sulfate, 5 g casamino acids, 20 g glucose per  
195 liter) + 1 g/L 5-FOA (reporter switching). Plates were incubated for 3 days and then CFUs were counted  
196 using a colony counter (Synbiosis Acolyte). For prion reporter switching, *MDG1* has no defined function  
197 in mutagenesis or DNA repair, but is down-regulated in [*MPH1*<sup>+</sup>] cells. Thus, [*mph1*<sup>-</sup>] cells can grow on  
198 media lacking uracil, but [*MPH1*<sup>+</sup>] cells cannot. In contrast, [*MPH1*<sup>+</sup>] cells can grow on 5-FOA, whereas  
199 [*mph1*<sup>-</sup>] cells cannot.

200

201 **Meiotic Recombination Assays.** Meiotic reporter strains were generated by amplifying a *K.lactis URA3*  
202 cassette off the *pUG72* plasmid (Euroscarf) with primers targeting the marker 50kb upstream of the  
203 *his3 $\Delta$*  locus of BY4741. These PCR products were transformed into [*mph1*<sup>-</sup>], [*MPH1*<sup>+</sup>], and *mph1 $\Delta$*  strains



204 as described above. A functional *HIS3* marker was also re-integrated back into its endogenous locus via  
205 PCR into *BY4742* [*mph1*<sup>-</sup>] wild-type and *mph1Δ*. *BY4741* and *BY4742* strains of the corresponding *MPH1*  
206 genotype were crossed to generate His<sup>+</sup> Ura<sup>+</sup> diploids and then sporulated as described above. Dozens  
207 of colonies were picked for each and tested for co-segregation of *URA3* and *HIS3* markers.

208 For the genetic cross experiments with lab and clinical strains, the [*mph1*<sup>-</sup>] and [*MPH1*<sup>+</sup>]  
209 laboratory strains above were crossed to the clinical isolate YJM975 (SGRP). Diploids were sporulated as  
210 before and then 96 spores were picked for each. Spores were pinned in quadruplicate onto solid YPD  
211 plates with the following stressors: 39°C, 128 µg/mL fluconazole, 1 mM amphotericin B, 120 µg/mL  
212 calcofluor white, 0.01% H<sub>2</sub>O<sub>2</sub>. Yeast were grown at 30°C (except in the case of 39°C heat stress) for 3-4  
213 days and then pictures were taken and colony size analysis was conducted using SGAtools (Wagih et al.,  
214 2013). Distributions were normalized to the means of the population.

215

216

217

218

219

220

221

222

223

224

225

226

227

228 **RESULTS**

229 **[*MPH1*<sup>+</sup>] is a protein-based genetic element**

230 We previously found that transient overexpression of Mph1 could elicit heritable zinc resistance that  
231 had properties consistent with protein-based inheritance (Chakrabortee et al., 2016). These included  
232 non-Mendelian segregation of this phenotype in genetic crosses (it was inherited by all meiotic progeny  
233 rather than half), and a strong reliance on molecular chaperones (Hsp70 proteins) for propagation from  
234 one generation to the next. This chaperone dependence was unusual – most previously known prions  
235 depend on Hsp104 to propagate (Shorter and Lindquist, 2005) – and Mph1 lacks the glutamine or  
236 asparagine-rich regions typical of nearly all known prions. We therefore investigated whether this  
237 Mph1-dependent epigenetic state was a *bona fide* protein-based genetic element.

238 Prion acquisition commonly elicits heritable changes in the localization of causal protein(s)  
239 (Derkatch et al., 2001). We investigated whether this was true for the Mph1-dependent epigenetic  
240 state, taking advantage of the fact that prions are dominant (Shorter and Lindquist, 2005). We crossed a  
241 yeast strain expressing an endogenous *MPH1-YFP* fusion to a strain harboring the Mph1-dependent  
242 epigenetic state, and to genetically identical (isogenic) naïve cells as a control. There was no apparent  
243 difference between these groups in exponentially growing cells. However, in stationary phase cells,  
244 Mph1-YFP foci were evident in diploids harboring the Mph1-dependent epigenetic state, but not in  
245 isogenic naïve diploids (Fig. S1).

246 We next tested whether the Mph1-dependent epigenetic state could be transmitted by  
247 cytoplasmic mixing without transfer of any nuclear material, another hallmark of prion biology (Wickner  
248 et al., 2006). To do so, we performed ‘cytoduction’ experiments with *kar1-15* mutants in which nuclei do  
249 not fuse during mating (Fig. S2A; see methods). The Mph1-dependent epigenetic state was robustly  
250 transferred to naïve recipient cells through such ‘cytoduction’ experiments (Fig. S2B). These data thus  
251 establish that the phenotype did not arise from genetic mutation.

252 Finally, we performed a protein transformation as the ‘gold-standard’ test for prion-based  
253 inheritance. We generated nuclease-digested lysates from cells harboring the Mph1-dependent  
254 epigenetic state and from isogenic naïve cells. We used these lysates to transform naïve spheroplasts  
255 (yeast lacking a cell wall), including a carrier plasmid harboring a *URA3* marker to enrich for cells that  
256 were competent to uptake molecules from their external milieu (Fig. S2C; see methods). We picked  
257 dozens of Ura<sup>+</sup> colonies, propagated them on 5-FOA to select for loss of the carrier plasmid, and  
258 characterized the phenotypes of the resulting cells. Strikingly, over 40% of them also acquired the  
259 Mph1-dependent epigenetic state (scored by resistance to ZnSO<sub>4</sub>; Fig. 1A;  $p=1.6 \times 10^{-4}$  by t-test). When  
260 benchmarked against the low natural abundance of Mph1 (~80 molecules per cell (Kulak et al., 2014)),  
261 this frequency of transmission is substantially more efficient than for other prions that have been tested  
262 (Tanaka and Weissman, 2006). We conclude that the Mph1-dependent epigenetic state is a *bona fide*  
263 protein-based genetic element – a prion – which we hereafter refer to as [MPH1<sup>+</sup>].

264

### 265 [MPH1<sup>+</sup>] promotes DNA damage tolerance and genome stability

266 Because Mph1 plays a central role in genome integrity we tested the ability of [MPH1<sup>+</sup>] cells to  
267 withstand DNA damage. The prion had no effect on growth in rich medium alone. We next exposed  
268 [*mph1*], [MPH1<sup>+</sup>], and *mph1*Δ cells to a battery of genotoxic insults, including replication stressors  
269 (hydroxyurea, mycophenolic acid), intercalating agents (doxorubicin), lesion inducers (4-NQO), alkylating  
270 agents (MMS), topoisomerase inhibitors (oxolinic acid), DNA break inducers (phleomycin), and  
271 crosslinkers (cisplatin, camptothecin, mitomycin C). In most of these conditions, cells harboring [MPH1<sup>+</sup>]  
272 grew better than isogenic [*mph1*] cells, and the prion was never maladaptive (Fig. 1B). In contrast,  
273 *mph1*Δ cells were hypersensitive to most genotoxic stressors. Many amyloid-based prions act by  
274 sequestering their constituent protein into aggregates. Thus their phenotypes often mimic the

275 corresponding genetic loss-of-function. Our data indicate that [*MPH1*<sup>+</sup>] is capable of driving gain-of-  
276 function phenotypes.

277 Mph1 overexpression strongly increases the frequency of gross chromosomal rearrangements  
278 (GCR) and, conversely, *mph1Δ* decreases GCR formation (Banerjee et al., 2008). We observed no  
279 influence of [*MPH1*<sup>+</sup>] on GCRs using the same reporter strains employed in those studies ( $p=0.40$  by  
280 Student's t-test, Fig. S3) however, establishing that the prion state is distinct from a simple increase in  
281 Mph1 activity. We also examined mutagenesis using an assay in which loss-of-function mutations in the  
282 *CAN1* gene render cells resistant to the toxic arginine analog canavanine. As others have reported  
283 (Scheller et al., 2000), *mph1Δ* cells had an approximately tenfold increased spontaneous mutagenesis  
284 frequency compared to wild-type cells. In contrast, [*MPH1*<sup>+</sup>] cells had a three-fold *decreased* frequency  
285 of spontaneous mutation compared to isogenic [*mph1*<sup>-</sup>] cells (Fig. 1C), again consistent with [*MPH1*<sup>+</sup>]  
286 driving gains-of-function. We observed the same anti-mutator phenotype when scoring resistance to the  
287 antifungal drug fluconazole (Fig. 1D), establishing that these relationships were not unique to the  
288 forward mutagenesis assay employed. We also observed decreased frequencies of induced mutagenesis  
289 in [*MPH1*<sup>+</sup>] cells (e.g. with MMS and oxolinic acid; Fig. 1C).

290 One possible explanation for the decreased mutation frequency in [*MPH1*<sup>+</sup>] cells would be  
291 preferential engagement of error-free repair pathways, which often involve homologous recombination.  
292 Indeed, Mph1 has been implicated in pathway choice decisions in multiple organisms (Huang et al.,  
293 2013; Xue et al., 2015b) and [*MPH1*<sup>+</sup>] provides resistance to agents that induce DSBs (e.g. phleomycin;  
294 Fig. 1B), which serve as precursors to HR. Using a simple assay for integration of a *HIS3* marker at its  
295 endogenous locus (see methods), we found that [*MPH1*<sup>+</sup>] drives a robust increase in HR (5.3-fold;  
296  $p=0.003$  by t-test; Fig. S4), providing a possible explanation for the reduced mutagenesis frequency.  
297 Collectively, our data establish that [*MPH1*<sup>+</sup>] enhances survival and preserves genome integrity during  
298 wide range of genotoxic insults.

299

### 300 **[MPH1<sup>+</sup>] phenotypes require helicase function**

301 The gains-of-function in [MPH1<sup>+</sup>] cells led us to investigate whether Mph1's catalytic activity was  
302 required for prion-dependent phenotypes. To test this, we employed a well-characterized inactivating  
303 point mutation in Mph1's active site (*mph1-Q603D*, (Chen et al., 2009)). We crossed isogenic [MPH1<sup>+</sup>]  
304 and [*mph1*<sup>-</sup>] cells to a naïve strain harboring *mph1-Q603D*, selected diploids, sporulated them, and then  
305 examined meiotic progeny that harbored the *mph1-Q603D* alleles (Fig. 2A).

306 As expected, [MPH1<sup>+</sup>] progeny harboring the wild-type allele were more resistant to 4-NQO than  
307 matched [*mph1*<sup>-</sup>] progeny ( $p=0.014$  by t-test, Fig. 2B). In contrast, [MPH1<sup>+</sup>] progeny harboring the *mph1-*  
308 *Q603D* allele were as sensitive to 4-NQO as [*mph1*<sup>-</sup>] progeny harboring the catalytically inactive variant  
309 ( $p=0.21$ , Fig. 2B). Thus, Mph1 activity is required to produce [MPH1<sup>+</sup>] phenotypes. We tested whether  
310 Mph1 catalytic function was also required for prion propagation (Fig. 2A). To do so we crossed meiotic  
311 progeny (arising from the previous cross) harboring the *mph1-Q603D* allele to naïve, wild-type strains to  
312 create heterozygous diploids in which Mph1 function was restored. Prion-dependent resistance to 4-  
313 NQO re-emerged in these strains ( $p= 0.047$  by t-test, Fig. 2B), establishing that the helicase function of  
314 Mph1 is required to produce DNA damage resistance, but not to propagate the prion itself.

315

### 316 **[MPH1<sup>+</sup>] phenotypes require FA pathway components**

317 As a scaffold, Mph1 interacts with many factors involved in both error-free and error-prone DNA repair  
318 (Daee et al., 2012; Ward et al., 2012; Xue et al., 2015a). We applied classical epistasis to examine how  
319 these interactions influence [MPH1<sup>+</sup>]-dependent phenotypes, capitalizing on the fact that [MPH1<sup>+</sup>] is  
320 transmitted to all progeny of meiosis (Chakrabortee et al., 2016). We crossed isogenic [MPH1<sup>+</sup>] and  
321 [*mph1*<sup>-</sup>] cells to naïve strains harboring deletions of thirteen previously reported Mph1-interacting  
322 genes, related helicases, proteins involved in inter-strand crosslink (ICL) repair, and FA pathway

323 components. We then sporulated these diploids and selected six [*MPH1*<sup>+</sup>] and [*mph1*<sup>-</sup>] progeny  
324 harboring each gene deletion. Finally, we exposed these strains to genotoxic stress and compared how  
325 [*MPH1*<sup>+</sup>] affected survival in the context of each gene deletion.

326 We observed strong genetic interactions between [*MPH1*<sup>+</sup>] and components of the FA pathway.  
327 This network has been best characterized in the context of ICL repair, where Mph1 scaffolds  
328 Msh2/Msh6 to recruit Exo1 and digest the ICL-harboring oligonucleotide. Mhf1/Mhf2 stabilizes Mph1  
329 complexes on chromatin at stalled replication forks and Chl1 (the yeast FancJ homolog) and Slx4 (the  
330 yeast FancP homolog) mediate downstream gap re-filling and fork reset (Dae et al., 2012). Loss of each  
331 of these FA factors eliminated [*MPH1*<sup>+</sup>]-dependent resistance to genotoxic stress (Fig. 2C).

332 Deletion of two genes encoding proteins related to Mph1/ICL repair, Pso2 (a nuclease and  
333 member of an orthogonal ICL epistasis group) (Ward et al., 2012) and Srs2 (the yeast RTEL1 helicase  
334 homolog), abolished the [*MPH1*<sup>+</sup>] phenotype, even though they are not linked to the FA pathway (Dae  
335 et al., 2012). These epistasis patterns establish that the phenotypic effects of [*MPH1*<sup>+</sup>] require  
336 engagement of most yeast Fanconi proteins (Ward et al., 2012), as well as other factors that are thought  
337 to function in independent, parallel repair pathways (Fig. 2C), raising the possibility that [*MPH1*<sup>+</sup>] exerts  
338 its phenotypes by re-wiring crosstalk among DNA repair factors.

339 We next tested whether these Mph1 interactions were required for prion propagation. To do so  
340 we crossed the haploid deletion strains in which [*MPH1*<sup>+</sup>]-dependent phenotypes had disappeared to  
341 naïve wild-type strains, creating heterozygous diploids in which gene function was restored. Strikingly,  
342 resistance to genotoxic stress re-emerged in only 3 strains: *exo1Δ/EXO1*, *rad5Δ/RAD5*, and  
343 *mgm101Δ/MGM101* (Fig. 2C). Thus, the remaining proteins (Rad51, Srs2, Mhf1, Mhf2, Chl1, Msh2,  
344 Msh6, Pso2, Slx4), which include most of the FA pathway, are required not only to manifest [*MPH1*<sup>+</sup>]  
345 phenotypes, but also to propagate the prion.

346 Genetic requirements for mutagenesis and survival in DNA damage can differ. We therefore

347 investigated how the loss of these same genes affected the anti-mutator phenotype of [*MPH1*<sup>+</sup>]. (This  
348 was only possible in haploids because most canavanine resistant mutants are recessive.) Cells lacking  
349 Mgm101, Pso2, and Rad51 inherited anti-mutator phenotypes from an [*MPH1*<sup>+</sup>] parent (Table S3), but  
350 those lacking Rad5, Msh2, Msh6, or Mhf1 did not inherit an anti-mutator phenotype. Strikingly, [*MPH1*<sup>+</sup>]  
351 led to large *increases* in mutation frequency in strains lacking Slx4 and Mhf2. Mhf2 stabilizes aberrant  
352 DNA structures, allowing helicases such as Mph1 to remodel them. Slx4 is a structure-specific  
353 endonuclease that also acts on aberrant DNA structures (particularly branched substrates) (Fricke and  
354 Brill, 2003). Slx4 has overlapping specificity with another DNA helicase, Sgs1 (BLM in humans), which  
355 interacts with topoisomerase 3 to process stalled replication forks (Fricke and Brill, 2003). As with Slx4,  
356 loss of Sgs1 also led to a strong mutator phenotype in the presence of [*MPH1*<sup>+</sup>]. Our data thus strongly  
357 suggest that the anti-mutator phenotype in [*MPH1*<sup>+</sup>] cells depends on Slx4, Sgs1, and Mhf2 activities,  
358 and likely their ability to resolve aberrant DNA intermediates in a non-mutagenic fashion.

359

### 360 **Prion-dependent toxicity of Mph1 and FANCM overexpression**

361 A hallmark of many prion proteins is that they can be toxic when overexpressed in matched [*PRION*<sup>+</sup>]  
362 strains, but not in naïve cells (Fig. 3A). This toxicity typically requires specific protein domains that are  
363 important for prion propagation (Douglas et al., 2008). Mph1 overexpression from a constitutive  
364 promoter was indeed significantly more toxic in [*MPH1*<sup>+</sup>] cells than in [*mph1*<sup>-</sup>] cells ( $p=0.04$  by t-test, Fig.  
365 3B). We used this growth impairment as a tool to dissect which domains of Mph1 fuel its prion-like  
366 properties. Mph1 does not harbor N/Q-rich prion-like domains (Fig. 3C). However, it does contain  
367 multiple, large, extremely disordered regions outside of its helicase domain (Jones and Cozzetto, 2015)  
368 (Fig. 3D), particularly at the C-terminus. This pattern of disorder is highly conserved in the human  
369 ortholog FANCM (Fig. 3D), and truncation of the disordered C-terminal region is the most frequent  
370 FANCM variant observed in human cancers (Cerami et al., 2012). Notably, Mph1 variants lacking its large

371 C-terminal disordered region did not exert prion dependent toxicity (Fig. 3B), despite similar levels of  
372 expression (Fig. S5), establishing the importance of this disordered region in prion-dependent  
373 phenotypes.

374 We also transformed [*mph1*<sup>-</sup>] cells and [*MPH1*<sup>+</sup>] cells with plasmids encoding full-length FANCM  
375 and a variant lacking its disordered C-terminus (FANCM $\Delta$ C) under the control of the same constitutive  
376 promoter. Expression of full-length FANCM was also more toxic in [*MPH1*<sup>+</sup>] cells than in isogenic [*mph1*<sup>-</sup>]  
377 cells ( $p=0.036$  by t-test, Fig. 3B). In contrast, FANCM $\Delta$ C did not affect growth of either [*mph1*<sup>-</sup>] or  
378 [*MPH1*<sup>+</sup>] cells ( $p=0.47$  by t-test, Fig. 3B). Thus, despite its limited sequence identity, human FANCM  
379 appears to interact with yeast [*MPH1*<sup>+</sup>] to exert a toxicity that depends upon both its disordered C-  
380 terminus and the presence of the prion.

381

### 382 **Induction by environmental stress**

383 It has been suggested that prions might drive a quasi-Lamarckian form of inheritance (Halfmann et al.,  
384 2010; True and Lindquist, 2000), fueling heritable and adaptive phenotypic changes in response to  
385 transient environmental stressors (Holmes et al., 2013). Many prions can be modestly induced by  
386 perturbations that disrupt protein homeostasis (Jarosz et al., 2010). Yet only two, [*GAR*<sup>+</sup>] (Jarosz et al.,  
387 2014) and [*MOD*<sup>+</sup>] (Suzuki et al., 2012), are known to be induced by the same stresses to which they  
388 provide resistance. We tested whether any of the DNA damaging stresses in which [*MPH1*<sup>+</sup>] provides a  
389 benefit might also elicit its appearance, as would be expected for a Lamarckian epigenetic element. We  
390 did so using an *MDG1::URA3* reporter that we previously established provides a readout of the [*MPH1*<sup>+</sup>]  
391 prion state (Chakrabortee et al., 2016) (Fig. 4A).

392 Exposure to hydroxyurea increased the frequency of [*MPH1*<sup>+</sup>] acquisition seven-fold in these  
393 experiments ( $p=0.035$  by t-test; Fig. 4B). We observed no such effect for many other DNA damaging  
394 agents in which [*MPH1*<sup>+</sup>] provides an equivalent or greater adaptive advantage. These data establish



395 that the increased frequency of  $[MPH1^+]$  did not merely arise from selection for the prion. Starvation for  
396 another nutrient, phosphate, also strongly induced  $[MPH1^+]$  (6.4-fold,  $p=0.041$  by t-test). Both  
397 hydroxyurea and phosphate starvation have been linked to replication stress via depletion of  
398 deoxynucleotide pools (Young et al., 1967). Thus,  $[MPH1^+]$  can be induced not just by overexpression, as  
399 we did artificially, but also by a specific replication stressor to which it provides resistance, establishing  
400 that this prion can act as a quasi-Lamarckian element of inheritance.

401         Because replication stresses acted as a trigger for  $[MPH1^+]$ , we wondered whether intermediate  
402 structures in DNA repair processes might be important for templating and/or propagating the prion.  
403 Mph1 binds to specific DNA fork structures to assemble larger complexes at sites of damage (Xue et al.,  
404 2015b). Furthermore, other types of nucleic acids have been hypothesized to act as scaffolds for prion-  
405 like aggregation in amyloid bodies (Audas et al., 2016). Constitutive overexpression of Mph1 also leads  
406 to a mutator phenotype (Banerjee et al., 2008) that depends upon inactivation of another specialized  
407 DNA helicase, Pif1, which efficiently unwinds a type of DNA secondary structure known as G-  
408 quadruplexes (Paeschke et al., 2013). These guanine repeats form a stable planar structure through  
409 hydrogen bonding, which impedes their traversal by the replication machinery. We *transiently*  
410 overexpressed *PIF1* for ~25 generations in  $[MPH1^+]$  and  $[mph1^-]$  cells and investigated whether they  
411 maintained  $[MPH1^+]$ -dependent decreases in mutagenesis. Immediately following *PIF1* overexpression,  
412  $[MPH1^+]$ -dependent decreases in mutagenesis were completely abolished ( $p=0.40$  by t-test, Fig. 4C.).  
413 However, after we removed the *PIF1* plasmid and propagated the strains 3 times on standard rich  
414 medium (YPD) the  $[MPH1^+]$ -dependent mutagenic phenotypes re-emerged ( $p=0.027$  by t-test, Fig. 4C).  
415 These results indicate that specific DNA structures, such as G-quadruplex regions or perhaps other Pif1  
416 substrates, may play a central role in the manifestation of the  $[MPH1^+]$  phenotype, but are not required  
417 for propagation of the prion.

418

419 **[MPH1<sup>+</sup>] increases genetic and phenotypic diversification during meiosis**

420 Experiments in *Arabidopsis thaliana* (Crismani et al., 2012) and *Schizosaccharomyces pombe* (Lorenz et  
421 al., 2012) have identified Mph1/FANCM as the strongest known inhibitor of crossover formation during  
422 meiosis. We therefore tested whether [MPH1<sup>+</sup>] exerted any influence on meiotic crossovers in *S.*  
423 *cerevisiae*. To do so we constructed a yeast strain harboring a functional *URA3* cassette 50kb upstream  
424 of a non-functional *his3Δ1* mutation, enabling us to examine co-segregation of these linked genetic  
425 markers (Fig. 5A). We mated this strain, which could grow on media lacking uracil but not on media  
426 lacking histidine, to isogenic [MPH1<sup>+</sup>] and [*mph1*<sup>-</sup>] strains, which harbored a non-functional *ura3Δ0*, but  
427 an intact *HIS3* locus. We then selected diploids and induced meiosis. There was no difference in  
428 sporulation efficiency between [*mph1*<sup>-</sup>] and [MPH1<sup>+</sup>] harboring cells ( $p=0.45$  by Student's t-test, Fig. S6).  
429 After 10 days, we isolated meiotic progeny and examined the frequency of His<sup>+</sup> Ura<sup>+</sup> recombinant  
430 spores derived from both [MPH1<sup>+</sup>] and [*mph1*<sup>-</sup>] parents. Recombinant phenotypes (*i.e.* those in which  
431 re-assortment of linked parental markers occurred) were substantially more common in meiotic  
432 progeny derived from [MPH1<sup>+</sup>] parents compared to those derived from [*mph1*<sup>-</sup>] parents (4.4-fold;  $P =$   
433 0.02 by T-test; Fig. 5B), establishing that the prion fundamentally altered the degree of linkage the cross.

434 *S. cerevisiae* naturally produces many crossovers per chromosome, a feature that has motivated  
435 its use as a genetic model organism. As a consequence, its linkage blocks are small and most  
436 polymorphisms within them are thought to be passenger mutations rather than causal variants. We  
437 nonetheless investigated whether [MPH1<sup>+</sup>] might spark increased phenotypic variation in natural *S.*  
438 *cerevisiae* outcrosses. We mated isogenic [*mph1*<sup>-</sup>] and [MPH1<sup>+</sup>] laboratory strains to a sequenced clinical  
439 strain isolated from an Italian patient (YJM975 (Strope et al., 2015)). As a frame of reference, the genetic  
440 divergence between open reading frames in these strains (0.5%) is only slightly greater than that  
441 between human individuals. We isolated diploids from these matings, induced meiosis, and isolated  
442 spores (Fig. 5C; see SI). We confirmed that these spores were *bona fide* meiotic recombinants based on

443 mating type tests and then exposed these progeny to physiological stressors relevant to the clinical  
444 niche: heat stress, antifungal drugs, and oxidative stress, measuring colony size as a proxy for growth.  
445 The presence of  $[MPH1^+]$  significantly increased the phenotypic variation in these cells (Fig. 5D-G).

446 To test whether this increased phenotypic diversity arose from the enhanced re-assortment of  
447 genetic information during meiosis, or rather due to some other effect of  $[MPH1^+]$  (e.g. decreased  
448 mutation rate, phenotypic capacitance, etc.), we also examined phenotypic variation produced by the  
449 prion in the parental strains. We transferred  $[MPH1^+]$  to each parent by cytoduction (see SI for  
450 experimental details) and examined the variance in phenotype across the same stressors that we used  
451 to examine the meiotic progeny. The variance in phenotype imparted by  $[MPH1^+]$  was much smaller in  
452 each parent than it was in the meiotic progeny (Fig. 5D-G, Fig. S7) and curing of the prion did not  
453 eliminate these traits (Fig. S9), establishing that the prion itself did not increase phenotypic variance in a  
454 static genetic background. Thus, even given a restricted degree of parental genetic diversity and the high  
455 baseline recombination rate of *S. cerevisiae*,  $[MPH1^+]$  can sharply increase heritable phenotypic  
456 diversification during meiosis.

457 Changes in protein homeostasis have previously been shown to modulate genotype to  
458 phenotype relationships (Jarosz et al., 2010). To confirm that  $[MPH1^+]$  was not acting as a phenotypic  
459 capacitor and influencing manifestation of the observed phenotypes in the new genetic backgrounds,  
460 we picked multiple meiotic progeny and “cured” them of  $[MPH1^+]$  via transient inhibition of the  
461 molecular chaperone Hsp70 (Chakrabortee et al., 2016). Outlier progeny both resistant and sensitive to  
462 heat stress were transformed with a plasmid containing a dominant negative variant of Hsp70 (Ssa1-  
463 K69M) and propagated for ~75 generations on selective media to eliminate inheritance of the prion (as  
464 has been described previously). Then the plasmid was eliminated and normal Hsp70 function was  
465 restored for an additional ~25 generations. The strains were then arrayed onto a plate in a 10-fold  
466 dilution series and allowed to grow up for 3 days (Fig. S8). While  $[MPH1^+]$ -dependent phenotypes (e.g.

467 zinc resistance) were curable in this experiment, phenotypes that arose uniquely in the meiotic progeny  
468 (e.g. resistance to heat stress) were not.

469

470  
471  
472

473 **Discussion**

474 To survive in dynamic, fluctuating environments, organisms must acquire new heritable traits. However,  
475 a multitude of mechanisms that safeguard DNA replication often create a phenotypic ‘lock in’, limiting  
476 the source of biological novelty to relatively modest changes in the genetic code. Dynamic,  
477 environmentally regulated signaling networks offer one solution to this problem. Epigenetic ‘bet-  
478 hedging’ mechanisms may provide another (Halfmann et al., 2010; Lancaster and Masel, 2009; True and  
479 Lindquist, 2000). Such systems increase phenotypic variation, creating sub-populations that express  
480 different traits than the majority. In fluctuating environments, these new traits might enable survival of  
481 the population when it would otherwise have perished. However, the evolutionary value of most bet-  
482 hedging systems, including those driven by prions, depends upon the constant presence of the causal  
483 element. Mechanisms of this type have been implicated in the interpretation of genetic information  
484 (True and Lindquist, 2000), but none are known to permanently alter the genome. Our data establish  
485 that one such element, the prion [*MPH1*<sup>+</sup>], has the power to do so. This prion is highly transmissible and  
486 can be induced in environments where it is adaptive, providing a robust mechanism for Lamarckian  
487 inheritance that controls fundamental decisions in DNA damage tolerance, mutagenesis, and meiotic  
488 recombination.

489         Perhaps the greatest force driving genetic diversification in eukaryotes is sexual reproduction.  
490 Re-assortment of alleles in meiosis ensures that every genome is fundamentally new. But within this  
491 genomic patchwork, linkage blocks can be found in which multiple polymorphisms are inherited in *cis*.  
492 As an epistemological tool, geneticists have long assumed that individual, ‘driver’ polymorphisms are  
493 linked to many other ‘passenger’ mutations that have no influence on phenotype. Yet evidence from  
494 fine mapping studies of individual quantitative trait loci in *S. cerevisiae* (Steinmetz et al., 2002) and  
495 metazoans (Mackay et al., 2009) alike suggest that multiple causal alleles can often occur within a single  
496 linked genetic locus. The increased phenotypic diversity that we observed in genetic crosses with

497 [MPH1<sup>+</sup>] parents suggest, even in crosses with limited genetic diversity and in an organism with small  
498 haplotype blocks, that alleles impacting the same phenotype can commonly be linked. This genetic  
499 architecture may allow complex traits to persist in a greater number of meiotic progeny, which provides  
500 theoretical adaptive advantages. But it also limits meiotic re-assortment of the linked alleles. The  
501 [MPH1<sup>+</sup>] prion provides a molecular mechanism through which this fundamental decision – whether to  
502 couple or separate bits of genetic information as they are broadcast to the next generation – can be  
503 reset. The phenotypic consequences of such re-assortment, at least in the context of traits relevant to  
504 the clinical niche that we tested, are substantially more adaptive than would be expected from random  
505 mutagenesis (where >95% of mutations are detrimental (Eyre-Walker and Keightley, 2007)).

506         Many prions have long been assumed to be non-functional assemblies of a homogenous  
507 protein. However, the fact that the [GAR<sup>+</sup>] prion is composed of multiple proteins (Jarosz et al., 2014)  
508 suggests that some such elements might function as larger complexes. Indeed, the gain-of-function  
509 phenotypes driven by [MPH1<sup>+</sup>], as well as inheritance from one generation to the next, appear to be  
510 dependent on other interacting DNA repair factors (especially those in the yeast FA pathway). Our data  
511 also suggest that specific DNA structures may act as important intermediates for [MPH1<sup>+</sup>]  
512 phenotypes. The linking of diverse physiological outcomes to a single epigenetic state suggests that  
513 [MPH1<sup>+</sup>] is a coordinated program that fuels specific and heritable changes in DNA repair networks.  
514 During periods of nucleotide starvation, when cells are ill-suited to their environments, they can acquire  
515 [MPH1<sup>+</sup>] at higher rates. This improves their chances of survival and enhances phenotypic diversification  
516 of the next generation. Mph1 is not alone in its capacity to assemble in response to replication fork  
517 stress (Xue et al., 2014). Many DNA repair factors localize to large assemblies to exert their functions.  
518 Our data provide an example in which such an assembly can encode a new set of activities that are  
519 heritable over long biological timescales, with the capacity to permanently hardwire adaptive  
520 phenotypic diversity into the genome.

521 **Acknowledgements**

522 This work was supported by a National Institutes of Health New Innovator Award (NIH-DP2-GM119140),  
523 an NSF career award (NSFMCB1453762), a Searle Scholar Award (14-SSP-210), a Kimmel Scholar Award  
524 (SKF-15-154), and by a Science and Engineering Fellowship from the David and Lucile Packard  
525 Foundation to DFJ. JSB was supported by National Institutes of Health Training Grant (5T32GM007790-  
526 36). DMG was supported by a postdoctoral fellowship from the NIH (F32-GM109680). We thank  
527 members of the Jarosz laboratory as well as K. Cimprich (Stanford) and X. Zhao (MSKCC) for helpful  
528 comments, and S. Larios (Stanford) for reagent support.

529

530 **Financial Interests Statement**

531

532 The authors declare no competing financial interests.

533

534 **FIGURE LEGENDS**

535  
536 **Figure 1. [MPH1<sup>+</sup>] is a prion that protects against DNA damage mutagenesis.** (A) “Frequency of prion  
537 infectivity” for protein transformation comparing [*mph1*<sup>-</sup>] lysates (Mock) and [MPH1<sup>+</sup>]-harboring lysates.  
538 Infectivity is calculated as described in methods. [MPH1<sup>+</sup>] was scored by resistance to ZnSO<sub>4</sub>  
539 (Chakrabortee et al., 2016). Infectivity from assembled [PSI<sup>+</sup>] is displayed as a dotted horizontal line  
540 (Tanaka and Weissman, 2006). (B) Growth of [MPH1<sup>+</sup>] and *mph1*Δ cells in genotoxic stress relative to  
541 naïve [*mph1*<sup>-</sup>] cells. Error bars represent SEM from three or more biological replicates. (C-D)  
542 Spontaneous and induced mutation frequencies of [MPH1<sup>+</sup>] and *mph1*Δ cells, relative to naïve [*mph1*<sup>-</sup>],  
543 after growth in YPD (spontaneous) or after exposure to mutagenic agents (ex. 0.012% MMS or 100 μM  
544 oxolinic acid) (see methods for details). Naïve mutation frequencies increased dramatically after  
545 exposure to MMS and oxolinic acid (5x10<sup>-4</sup> and 2x10<sup>-5</sup> mutants per CFU respectively). Error bars  
546 represent SEM from 3 independent experiments.

547  
548 **Figure 2. [MPH1<sup>+</sup>] requires helicase activity and FA pathway components.** (A) Experimental schema for  
549 crossing [MPH1<sup>+</sup>] into mutant strains to determine whether [MPH1<sup>+</sup>]'s catalytic activity or interacting  
550 proteins are required to manifest prion phenotypes (in haploid progeny) and/or propagate the prion. (B)  
551 Haploid parents: growth of wild-type [*mph1*<sup>-</sup>] and [MPH1<sup>+</sup>] in the DNA damage stressor 4-NQO (1.2 μM).  
552 Haploid mutant progeny: growth of [*mph1*<sup>-</sup>] and [MPH1<sup>+</sup>] strains harboring a single catalytically dead  
553 point mutation (*mph1-Q603D*) in the *MPH1* gene in 1.2 μM 4-NQO. Heterozygous diploids: growth of  
554 [*mph1*<sup>-</sup>] and [MPH1<sup>+</sup>] catalytically dead mutants in 1.2 μM 4-NQO after crossing back to a wild-type  
555 strain. Error bars represent SEM determined from 6 biological replicates and are present on all plots. (C)  
556 Left – Δ haploid: heatmap of Log<sub>2</sub>-transformed fold-changes in growth during DNA damage (4-NQO; see  
557 methods) of haploid progeny harboring deletions of Mph1-associated proteins after crossing with an  
558 [MPH1<sup>+</sup>] strain. Data are normalized to isogenic [*mph1*<sup>-</sup>] controls. Δ/WT diploid: data as above, but for



559 heterozygous diploids in which gene function was restored. Right – representative growth curves of  
560 cross-back, heterozygous diploids in which the  $[MPH1^+]$  phenotype was maintained or restored. Error  
561 bars represent SEM determined from 6 biological replicates.

562

563 **Figure 3. Prion-like behavior and intrinsic disorder is conserved in human FANCM.** (A) Schematic  
564 depicting the toxicity of casual protein overexpression in the presence of the corresponding prion. (B)  
565 Growth of  $[MPH1^+]$  strains harboring plasmids expressing FANCM and Mph1 variants. Values are  
566 normalized to corresponding  $[mph1^-]$  strains harboring the same plasmids. Error bars represent SEM  
567 from six biological replicates. (C) Scores from an algorithm that predicts prion-like sequences using a  
568 Hidden Markov model (PLAAC; (Lancaster et al., 2014)) for both Mph1 and Sup35. (D) Top: Intrinsic  
569 disorder predictions (Disopred3; (Jones and Cozzetto, 2015)) for Mph1 and FANCM. Bottom: Variants  
570 and domain architecture of Mph1 and FANCM used in this assay.

571

572 **Figure 4.  $[MPH1^+]$  is a quasi-Lamarckian element.** (A) Diagram of spontaneous switching from  $[mph1^-]$   
573 to  $[MPH1^+]$ . In this experiment, naïve reporter cells were treated with indicated stressors for 12 hours  
574 and assayed for modulated switching frequencies to  $[MPH1^+]$ . (B) Induction of  $[MPH1^+]$  compared to  
575 control in various conditions. Error bars represent SEM from 3 biological replicates. (C)  $[MPH1^+]$ -  
576 dependent changes in mutation frequency following a transient *PIF1* overexpression to eliminate G-  
577 quadruplex regions (Paeschke et al., 2013) and subsequent recovery after ~70 generations in rich media.  
578 Values normalized to corresponding  $[mph1^-]$  strain. Error bars represent SEM from 8 biological  
579 replicates.

580

581 **Figure 5.  $[MPH1^+]$  increases phenotypic diversification in the progeny of meiosis.** (A) Experimental  
582 schema for measuring linkage between 2 auxotrophic markers in  $[mph1^-]$  and  $[MPH1^+]$  strains. (B)

583 Relative frequencies of His<sup>+</sup> Ura<sup>+</sup> meiotic recombinant progeny in [*mph1*<sup>-</sup>], [*MPH1*<sup>+</sup>], *mph1*Δ strains  
584 compared to [*mph1*<sup>-</sup>]. Error bars represent SEM from 4 biological replicates. (C) Experimental schema for  
585 determining [*MPH1*<sup>+</sup>]-dependent phenotypic diversification following a cross between lab strains (with  
586 or without [*MPH1*<sup>+</sup>]) and a recently evolved clinical pathogen. (D-G) Histograms of normalized spore  
587 colony sizes from these crosses (calculated using SGAtools (Wagih et al., 2013)) in 4 clinically relevant  
588 stressors. Histograms were fit to a Gaussian distribution to generate curves.

589  
590 **Supplemental Figure 1. Localization of Mph1 protein in [*MPH1*<sup>+</sup>] cells.** Fluorescence micrographs from  
591 diploid cells harboring [*MPH1*<sup>+</sup>], or [*mph1*<sup>-</sup>] control, each expressing integrated *MPH1*-YFP from its  
592 endogenous promoter. Exponential phased cells were imaged at OD<sub>600</sub> ~0.5-0.8, stationary phase at  
593 OD<sub>600</sub> ~1.5-2.

594  
595 **Supplemental Figure 2. [*MPH1*<sup>+</sup>] is a cytoplasmic element.** (A). Experimental schema of cytoduction  
596 experiments. (B) Growth of [*mph1*<sup>-</sup>] and [*MPH1*<sup>+</sup>] cytoduced strains in a DNA stressor to which [*MPH1*<sup>+</sup>]  
597 promotes resistance (10 μM mycophenolic acid). Error bars represent SEM from 3 biological replicates.  
598 (C) Experimental schema for protein transformation experiments.

599  
600 **Supplemental Figure 3. [*MPH1*<sup>+</sup>] does not influence GCR mutagenesis.** (A) Diagram of GCR reporter  
601 used. Two counter-selectable markers (*URA3* and *CAN1*) are located upstream of an essential gene  
602 (*PCM1*). When cells are presented with a double counter-selection, the probability of mutating both  
603 genes in a single generation is vanishingly small. Therefore, resistant colonies will undergo a GCR event  
604 at the precise location, preserving the essential gene. (B) GCR frequencies in [*mph1*<sup>-</sup>] and [*MPH1*<sup>+</sup>]  
605 strains. Error bars represent SEM from 5 biological replicates.

606

607 **Supplemental Figure 4. [MPH1<sup>+</sup>] increases homologous recombination.** Normalized genomic  
608 integration frequencies of a linear DNA cassette in [*mph1*<sup>-</sup>] and [*MPH1*<sup>+</sup>] strains. Error bars represent  
609 SEM for 6 biological replicates.

610

611 **Supplemental Figure 5. Expression levels of FANCM and Mph1 variants.** Bar graph showing the relative  
612 expression levels of FANCM and Mph1 plasmids in [*MPH1*<sup>+</sup>] vs. [*mph1*] strains measured using RT-PCR.  
613 Error bars represent SEM from 3 biological replicates.

614

615 **Supplemental Figure 6. [MPH1<sup>+</sup>] does not affect sporulation.** Fraction of tetrads in [*mph1*] and  
616 [*MPH1*<sup>+</sup>] strains after 5 days. Error bars represent SEM from 3 biological replicates.

617

618 **Supplemental Figure 7. Phenotypic variation in [*mph1*] and [*MPH1*<sup>+</sup>] derivatives of laboratory and  
619 clinical parent strains.** Phenotypic distributions of [*mph1*] or [*MPH1*<sup>+</sup>] parental strains for wild cross in  
620 the 4 different stressors. Range of x-axis used is identical to each corresponding progeny histogram in  
621 Figure 5.

622

623 **Supplemental Figure 8. Mph1 does not act as a phenotypic capacitor.** Top panel: [*MPH1*<sup>+</sup>] parent strain  
624 before and after prion 'curing' spotted in a 10-fold dilution series on a plate containing 10 mM ZnSO<sub>4</sub>.  
625 Bottom panel: Heat-resistant progeny from wild outcross with an [*MPH1*<sup>+</sup>] parent before and after prion  
626 'curing' spotted in a 10-fold dilution series on a YPD plate grown at 39 °C.

627

628 **Supplemental Table 1. Yeast strains used in this study.**

629

630 **Supplemental Table 2. Plasmids used in this study.**

631

632 **Supplemental Table 3. Interacting proteins required for [MPH1<sup>+</sup>]-dependent anti-mutator phenotypes.**

633 Table showing [*mph1*] and [MPH1<sup>+</sup>] mutation frequencies for haploid progeny harboring genetic  
634 knockouts of DNA repair factors. 1<sup>st</sup> column – genotypes of each strain assayed; 2<sup>nd</sup> column – mutation  
635 frequency with SEM for each knockout in a naïve [*mph1*] strain; 3<sup>rd</sup> column – mutation frequency with  
636 SEM for corresponding [MPH1<sup>+</sup>] strain; 4<sup>th</sup> column – Fold-change in mutation frequency by each genetic  
637 knockout compared to a wild-type naïve [*mph1*] strain; 5<sup>th</sup> column – Fold-change in mutation frequency  
638 imparted by [MPH1<sup>+</sup>] for the same genotype.

639

640 **REFERENCES**

- 641 Alter, B.P. (1996). Fanconi's anemia and malignancies. *Am J Hematol* 53, 99-110.
- 642 Audas, T.E., Audas, D.E., Jacob, M.D., Ho, J.J., Khacho, M., Wang, M., Perera, J.K., Gardiner, C., Bennett,  
643 C.A., Head, T., *et al.* (2016). Adaptation to Stressors by Systemic Protein Amyloidogenesis. *Dev Cell* 39,  
644 155-168.
- 645 Banerjee, S., Smith, S., Oum, J.H., Liaw, H.J., Hwang, J.Y., Sikdar, N., Motegi, A., Lee, S.E., and Myung, K.  
646 (2008). Mph1p promotes gross chromosomal rearrangement through partial inhibition of homologous  
647 recombination. *J Cell Biol* 181, 1083-1093.
- 648 Cerami, E., Gao, J., Dogrusoz, U., Gross, B.E., Sumer, S.O., Aksoy, B.A., Jacobsen, A., Byrne, C.J., Heuer,  
649 M.L., Larsson, E., *et al.* (2012). The cBio cancer genomics portal: an open platform for exploring  
650 multidimensional cancer genomics data. *Cancer Discov* 2, 401-404.
- 651 Chakrabortee, S., Byers, J.S., Jones, S., Garcia, D.M., Bhullar, B., Chang, A., She, R., Lee, L., Fremin, B.,  
652 Lindquist, S., *et al.* (2016). Intrinsically Disordered Proteins Drive Emergence and Inheritance of  
653 Biological Traits. *Cell* 167, 369-381 e312.

- 654 Chen, Y.H., Choi, K., Szakal, B., Arenz, J., Duan, X., Ye, H., Branzei, D., and Zhao, X. (2009). Interplay  
655 between the Smc5/6 complex and the Mph1 helicase in recombinational repair. *Proc Natl Acad Sci U S A*  
656 *106*, 21252-21257.
- 657 Crismani, W., Girard, C., Froger, N., Pradillo, M., Santos, J.L., Chelysheva, L., Copenhaver, G.P., Horlow,  
658 C., and Mercier, R. (2012). FANCM limits meiotic crossovers. *Science* *336*, 1588-1590.
- 659 Dae, D.L., Ferrari, E., Longerich, S., Zheng, X.F., Xue, X., Branzei, D., Sung, P., and Myung, K. (2012).  
660 Rad5-dependent DNA repair functions of the *Saccharomyces cerevisiae* FANCM protein homolog Mph1.  
661 *J Biol Chem* *287*, 26563-26575.
- 662 Derkatch, I.L., Bradley, M.E., Hong, J.Y., and Liebman, S.W. (2001). Prions affect the appearance of other  
663 prions: the story of [PIN(+)]. *Cell* *106*, 171-182.
- 664 Douglas, P.M., Treusch, S., Ren, H.Y., Halfmann, R., Duennwald, M.L., Lindquist, S., and Cyr, D.M. (2008).  
665 Chaperone-dependent amyloid assembly protects cells from prion toxicity. *Proc Natl Acad Sci U S A* *105*,  
666 7206-7211.
- 667 Eyre-Walker, A., and Keightley, P.D. (2007). The distribution of fitness effects of new mutations. *Nat Rev*  
668 *Genet* *8*, 610-618.
- 669 Farmer, S., San-Segundo, P.A., and Aragon, L. (2011). The Smc5-Smc6 complex is required to remove  
670 chromosome junctions in meiosis. *PLoS one* *6*, e20948.
- 671 Fricke, W.M., and Brill, S.J. (2003). Slx1-Slx4 is a second structure-specific endonuclease functionally  
672 redundant with Sgs1-Top3. *Genes Dev* *17*, 1768-1778.
- 673 Gietz, D., St Jean, A., Woods, R.A., and Schiestl, R.H. (1992). Improved method for high efficiency  
674 transformation of intact yeast cells. *Nucleic Acids Res* *20*, 1425.
- 675 Halfmann, R., Alberti, S., and Lindquist, S. (2010). Prions, protein homeostasis, and phenotypic diversity.  
676 *Trends Cell Biol* *20*, 125-133.

677 Holmes, D.L., Lancaster, A.K., Lindquist, S., and Halfmann, R. (2013). Heritable remodeling of yeast  
678 multicellularity by an environmentally responsive prion. *Cell* 153, 153-165.

679 Huang, J., Liu, S., Bellani, M.A., Thazhathveetil, A.K., Ling, C., de Winter, J.P., Wang, Y., Wang, W., and  
680 Seidman, M.M. (2013). The DNA translocase FANCM/MHF promotes replication traverse of DNA  
681 interstrand crosslinks. *Mol Cell* 52, 434-446.

682 Jarosz, D.F., Brown, J.C., Walker, G.A., Datta, M.S., Ung, W.L., Lancaster, A.K., Rotem, A., Chang, A.,  
683 Newby, G.A., Weitz, D.A., *et al.* (2014). Cross-kingdom chemical communication drives a heritable,  
684 mutually beneficial prion-based transformation of metabolism. *Cell* 158, 1083-1093.

685 Jarosz, D.F., Taipale, M., and Lindquist, S. (2010). Protein homeostasis and the phenotypic manifestation  
686 of genetic diversity: principles and mechanisms. *Annu Rev Genet* 44, 189-216.

687 Jones, D.T., and Cozzetto, D. (2015). DISOPRED3: precise disordered region predictions with annotated  
688 protein-binding activity. *Bioinformatics* 31, 857-863.

689 Kulak, N.A., Pichler, G., Paron, I., Nagaraj, N., and Mann, M. (2014). Minimal, encapsulated proteomic-  
690 sample processing applied to copy-number estimation in eukaryotic cells. *Nat Methods* 11, 319-324.

691 Lancaster, A.K., and Masel, J. (2009). The evolution of reversible switches in the presence of irreversible  
692 mimics. *Evolution* 63, 2350-2362.

693 Lancaster, A.K., Nutter-Upham, A., Lindquist, S., and King, O.D. (2014). PLAAC: a web and command-line  
694 application to identify proteins with prion-like amino acid composition. *Bioinformatics* 30, 2501-2502.

695 Lorenz, A., Osman, F., Sun, W., Nandi, S., Steinacher, R., and Whitby, M.C. (2012). The fission yeast  
696 FANCM ortholog directs non-crossover recombination during meiosis. *Science* 336, 1585-1588.

697 Mackay, T.F., Stone, E.A., and Ayroles, J.F. (2009). The genetics of quantitative traits: challenges and  
698 prospects. *Nat Rev Genet* 10, 565-577.

699 McMahon, M.S., Sham, C.W., and Bishop, D.K. (2007). Synthesis-dependent strand annealing in meiosis.  
700 *PLoS Biol* 5, e299.

701 Meetei, A.R., Sechi, S., Wallisch, M., Yang, D., Young, M.K., Joenje, H., Hoatlin, M.E., and Wang, W.  
702 (2003). A multiprotein nuclear complex connects Fanconi anemia and Bloom syndrome. *Mol Cell Biol* **23**,  
703 3417-3426.

704 Moldovan, G.L., and D'Andrea, A.D. (2009). How the fanconi anemia pathway guards the genome. *Annu*  
705 *Rev Genet* **43**, 223-249.

706 Paeschke, K., Bochman, M.L., Garcia, P.D., Cejka, P., Friedman, K.L., Kowalczykowski, S.C., and Zakian,  
707 V.A. (2013). Pif1 family helicases suppress genome instability at G-quadruplex motifs. *Nature* **497**, 458-  
708 462.

709 Rockmill, B., Lambie, E.J., and Roeder, G.S. (1991). Spore enrichment. *Methods in Enzymology* **194**, 146-  
710 149.

711 Scheller, J., Schurer, A., Rudolph, C., Hettwer, S., and Kramer, W. (2000). MPH1, a yeast gene encoding a  
712 DEAH protein, plays a role in protection of the genome from spontaneous and chemically induced  
713 damage. *Genetics* **155**, 1069-1081.

714 Shorter, J., and Lindquist, S. (2005). Prions as adaptive conduits of memory and inheritance. *Nat Rev*  
715 *Genet* **6**, 435-450.

716 Soustelle, C., Vedel, M., Kolodner, R., and Nicolas, A. (2002). Replication protein A is required for meiotic  
717 recombination in *Saccharomyces cerevisiae*. *Genetics* **161**, 535-547.

718 Steinmetz, L.M., Sinha, H., Richards, D.R., Spiegelman, J.I., Oefner, P.J., McCusker, J.H., and Davis, R.W.  
719 (2002). Dissecting the architecture of a quantitative trait locus in yeast. *Nature* **416**, 326-330.

720 Strobe, P.K., Skelly, D.A., Kozmin, S.G., Mahadevan, G., Stone, E.A., Magwene, P.M., Dietrich, F.S., and  
721 McCusker, J.H. (2015). The 100-genomes strains, an *S. cerevisiae* resource that illuminates its natural  
722 phenotypic and genotypic variation and emergence as an opportunistic pathogen. *Genome Res* **25**, 762-  
723 774.

- 724 Suzuki, G., Shimazu, N., and Tanaka, M. (2012). A yeast prion, Mod5, promotes acquired drug resistance  
725 and cell survival under environmental stress. *Science* 336, 355-359.
- 726 Tanaka, M., and Weissman, J.S. (2006). An efficient protein transformation protocol for introducing  
727 prions into yeast. *Methods Enzymol* 412, 185-200.
- 728 True, H.L., and Lindquist, S.L. (2000). A yeast prion provides a mechanism for genetic variation and  
729 phenotypic diversity. *Nature* 407, 477-483.
- 730 Wagih, O., Usaj, M., Baryshnikova, A., VanderSluis, B., Kuzmin, E., Costanzo, M., Myers, C.L., Andrews,  
731 B.J., Boone, C.M., and Parts, L. (2013). SGAtools: one-stop analysis and visualization of array-based  
732 genetic interaction screens. *Nucleic Acids Res* 41, W591-596.
- 733 Ward, T.A., Dudasova, Z., Sarkar, S., Bhide, M.R., Vlasakova, D., Chovanec, M., and McHugh, P.J. (2012).  
734 Components of a Fanconi-like pathway control Pso2-independent DNA interstrand crosslink repair in  
735 yeast. *PLoS genetics* 8, e1002884.
- 736 Whitby, M.C. (2010). The FANCM family of DNA helicases/translocases. *DNA Repair (Amst)* 9, 224-236.
- 737 Wickner, R.B., Edskes, H.K., and Shewmaker, F. (2006). How to find a prion: [URE3], [PSI<sup>+</sup>] and [beta].  
738 *Methods* 39, 3-8.
- 739 Xue, X., Choi, K., Bonner, J., Chiba, T., Kwon, Y., Xu, Y., Sanchez, H., Wyman, C., Niu, H., Zhao, X., *et al.*  
740 (2014). Restriction of replication fork regression activities by a conserved SMC complex. *Molecular cell*  
741 56, 436-445.
- 742 Xue, X., Choi, K., Bonner, J.N., Szakal, B., Chen, Y.H., Papusha, A., Saro, D., Niu, H., Ira, G., Branzei, D., *et*  
743 *al.* (2015a). Selective modulation of the functions of a conserved DNA motor by a histone fold complex.  
744 *Genes Dev* 29, 1000-1005.
- 745 Xue, X., Sung, P., and Zhao, X. (2015b). Functions and regulation of the multitasking FANCM family of  
746 DNA motor proteins. *Genes Dev* 29, 1777-1788.



747 Young, C.W., Schochetman, G., and Karnofsky, D.A. (1967). Hydroxyurea-induced inhibition of  
748 deoxyribonucleotide synthesis: studies in intact cells. *Cancer Res* 27, 526-534.  
749

# Figure 1

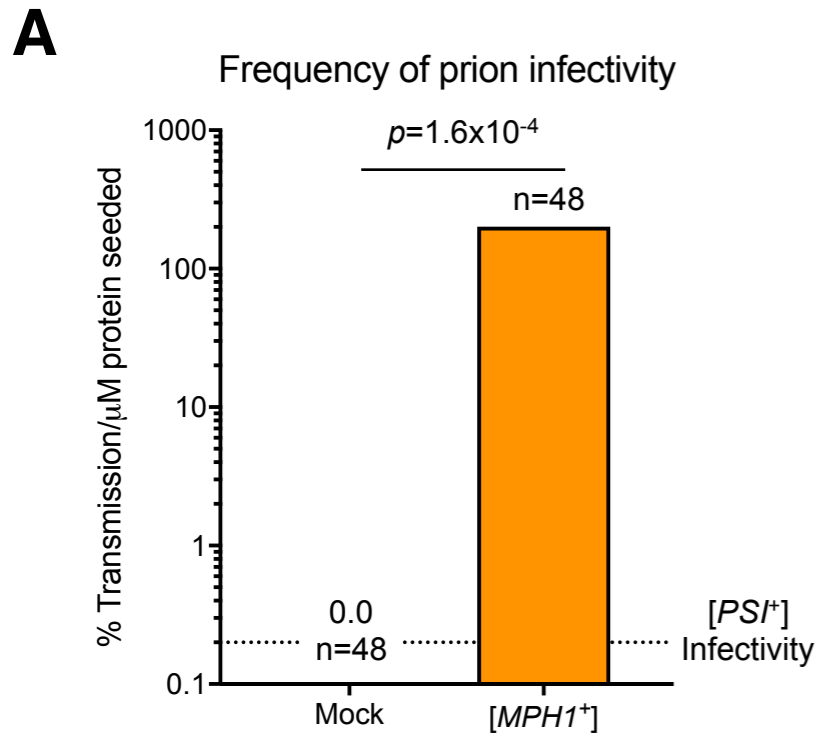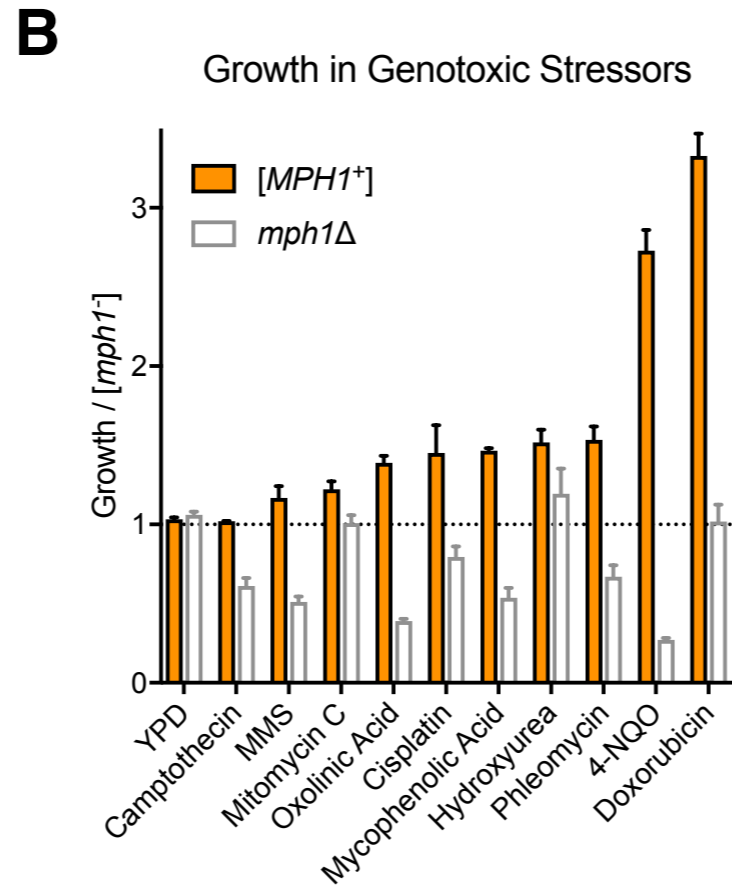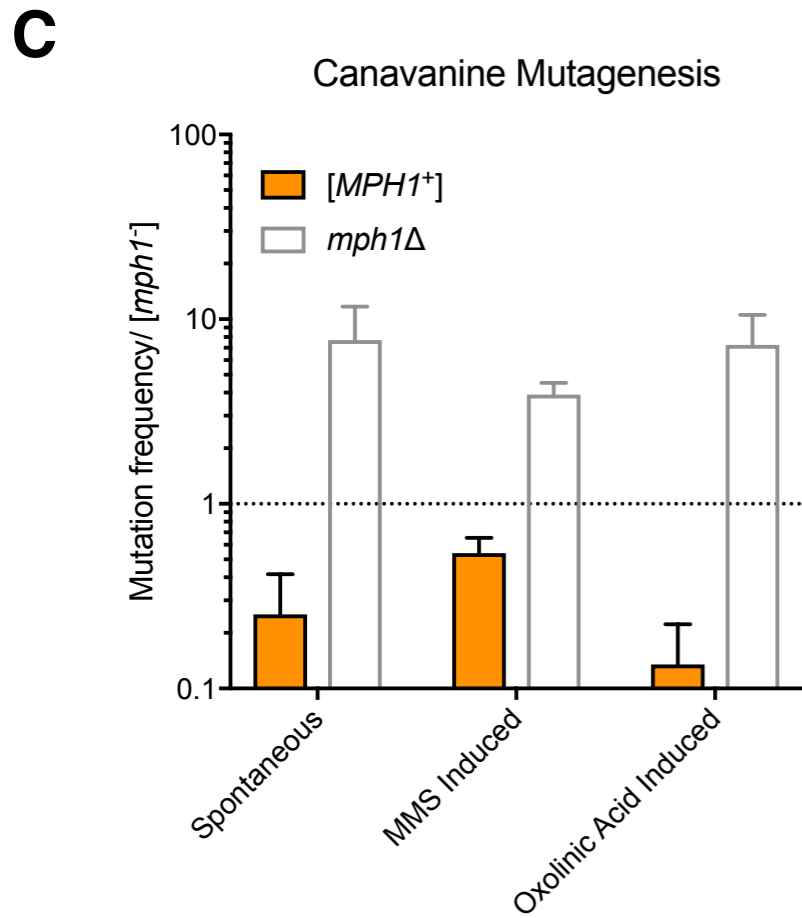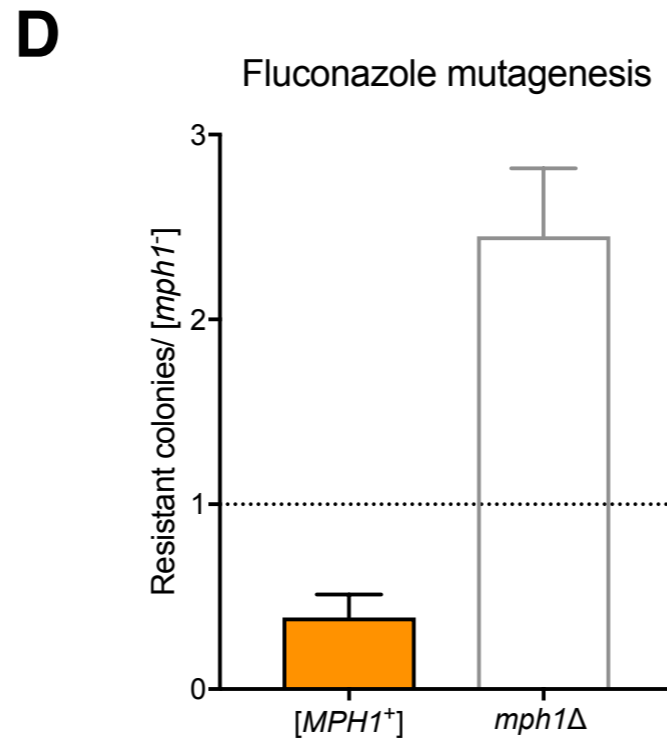

Figure 2

**A**

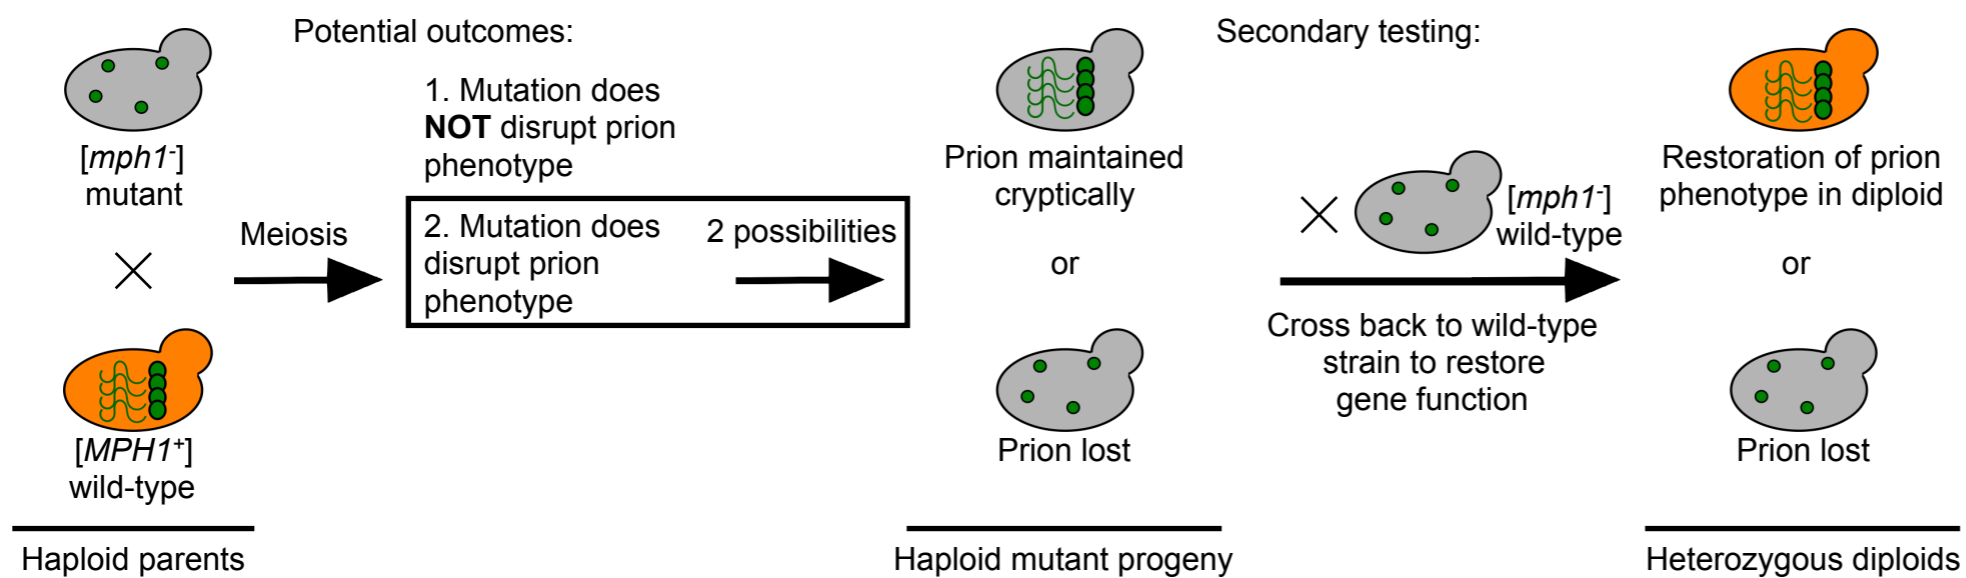

**B**

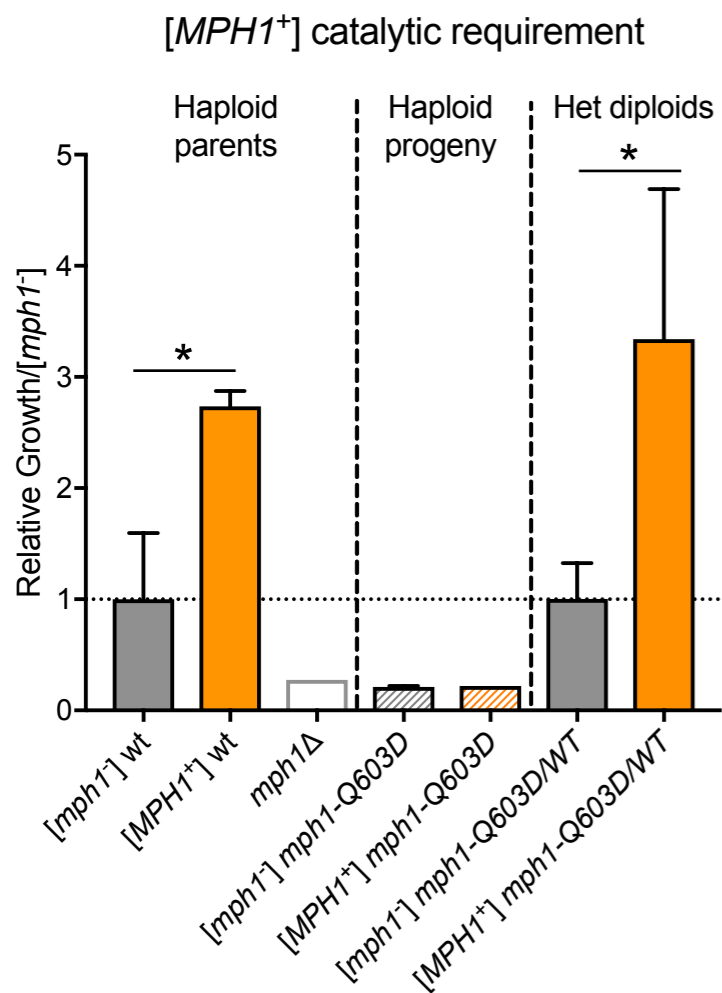

**C**

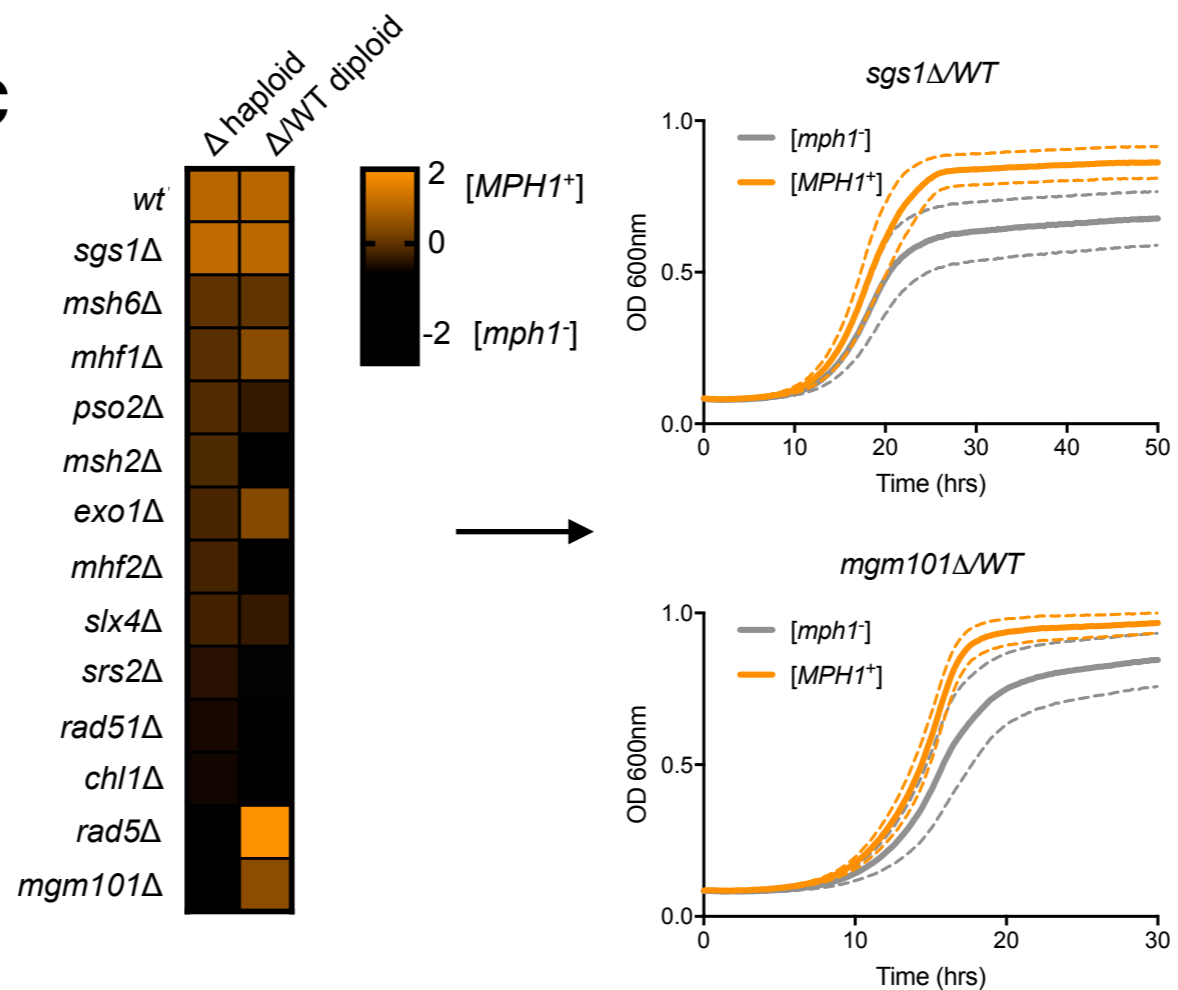

Figure 3

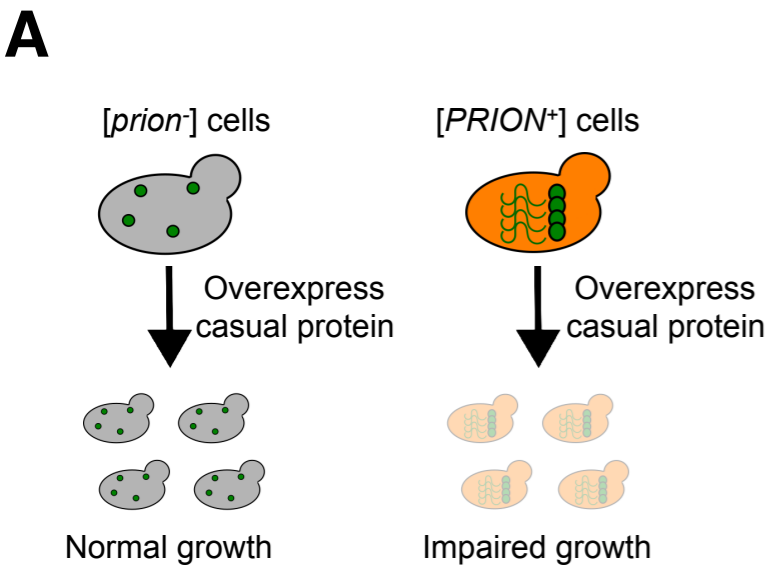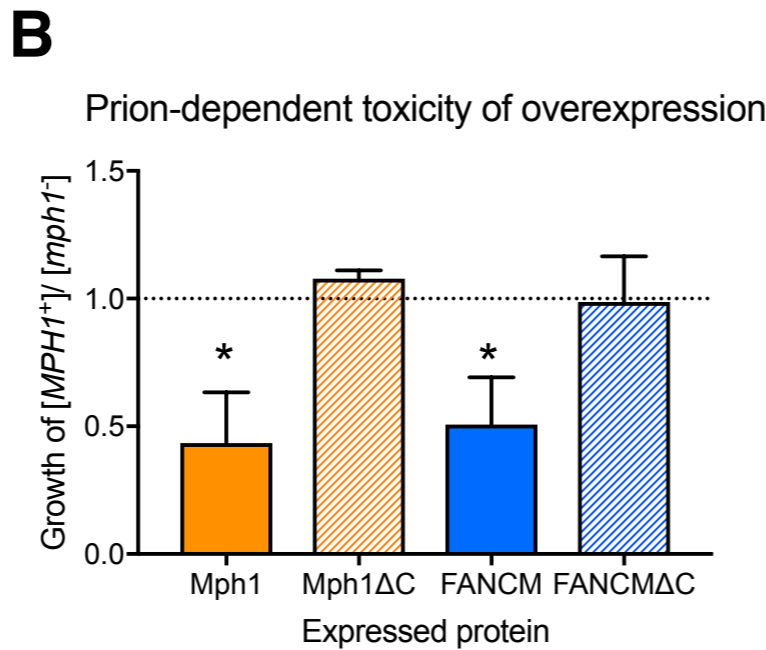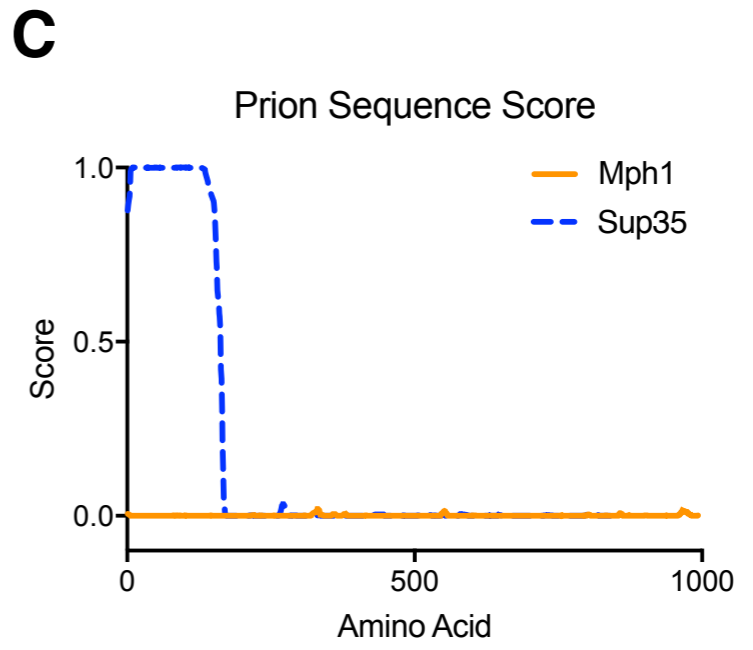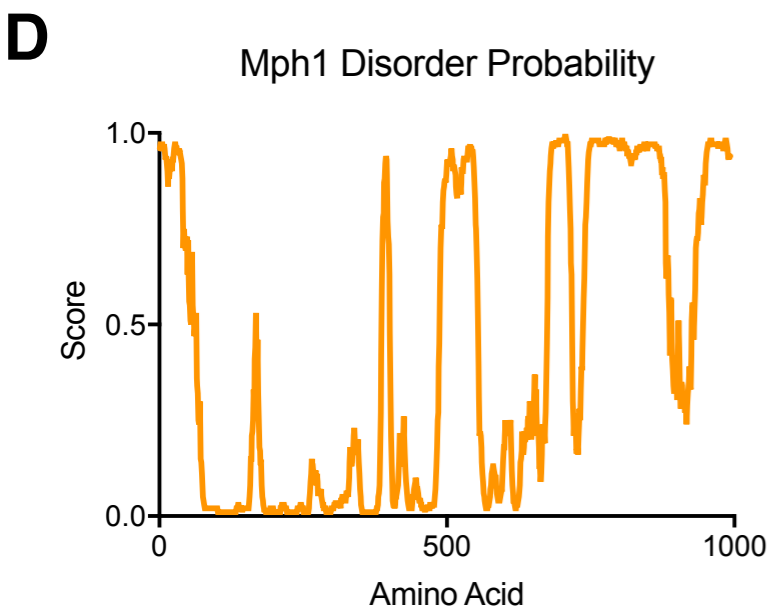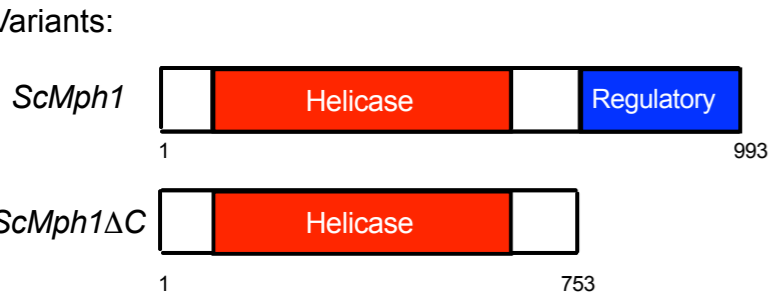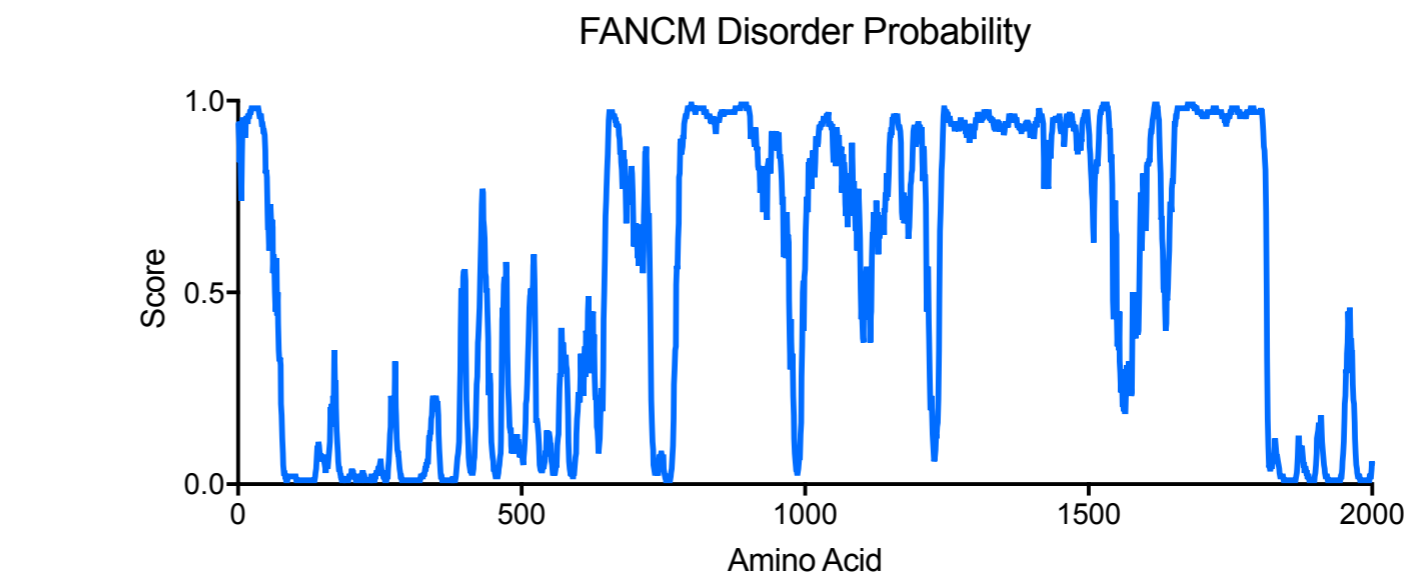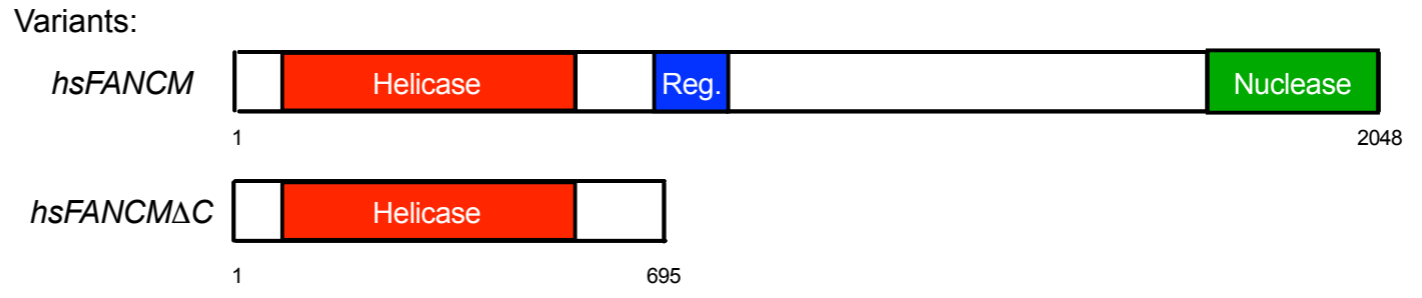

Figure 4

**A**

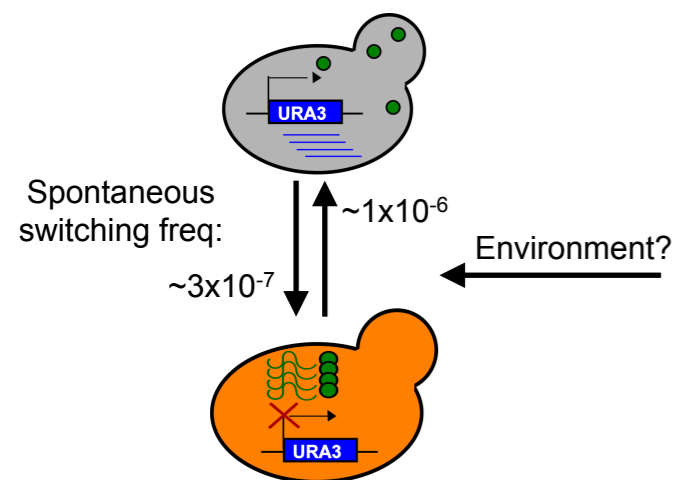

**B**

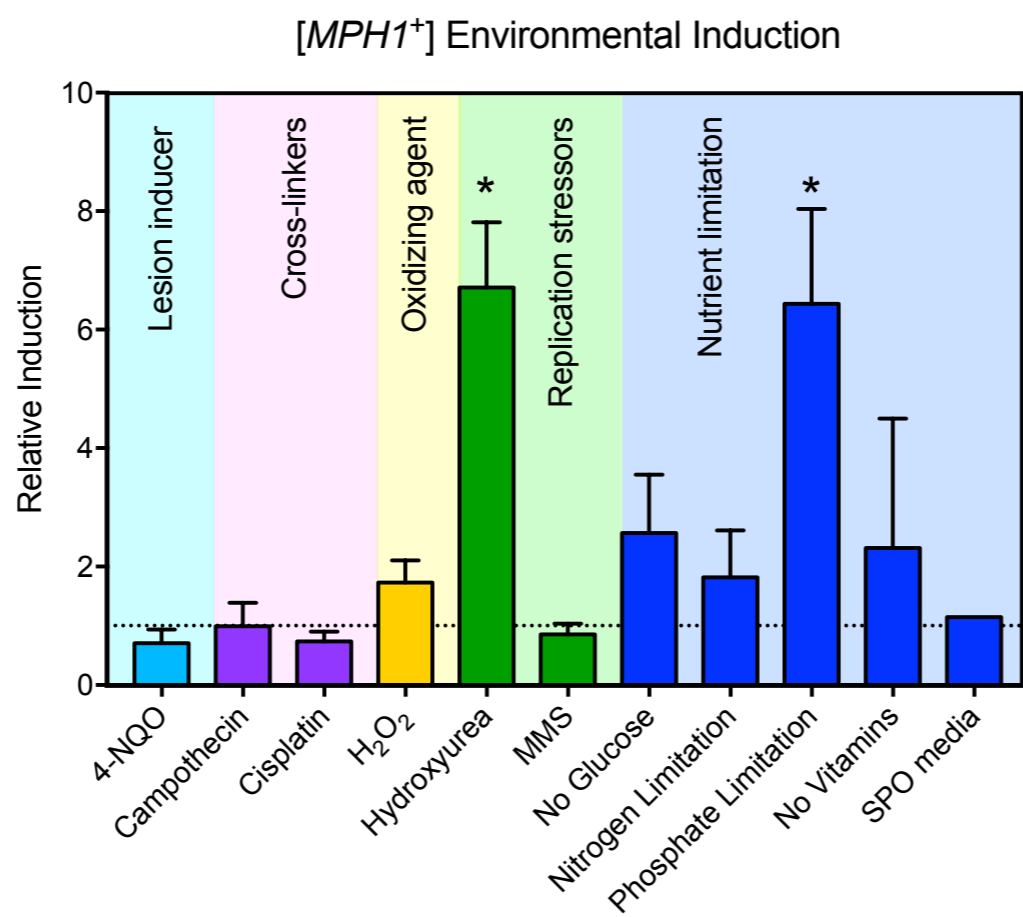

**C**

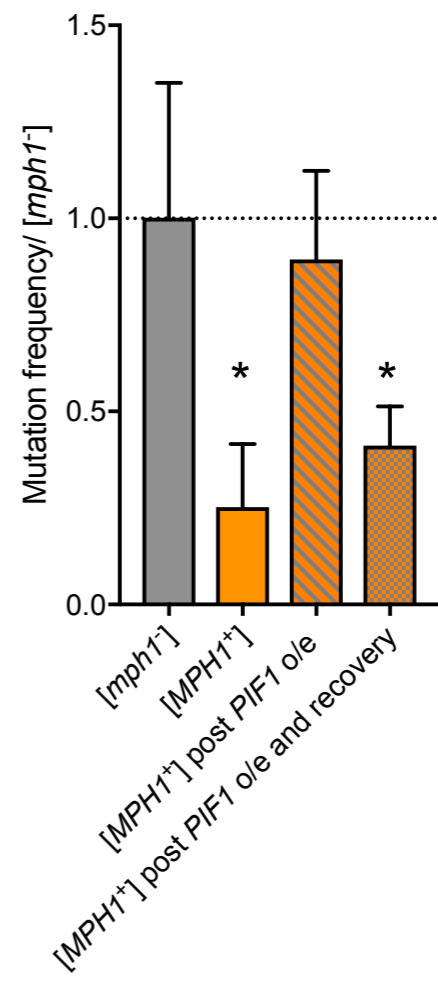

Figure 5

**A**

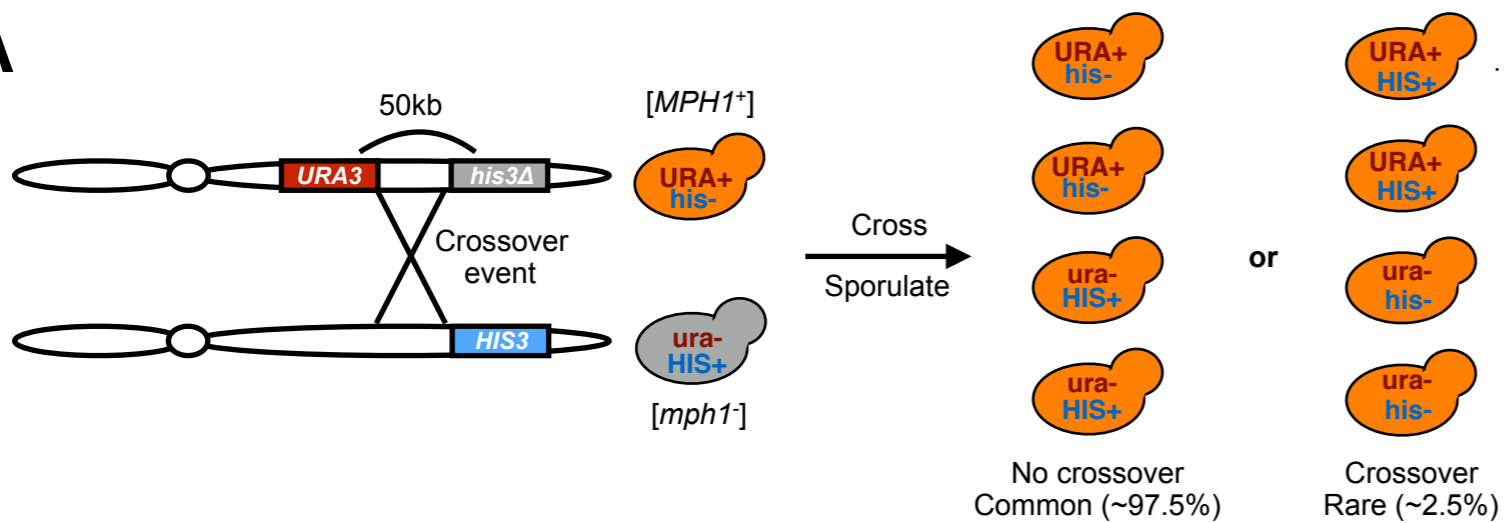

**B**

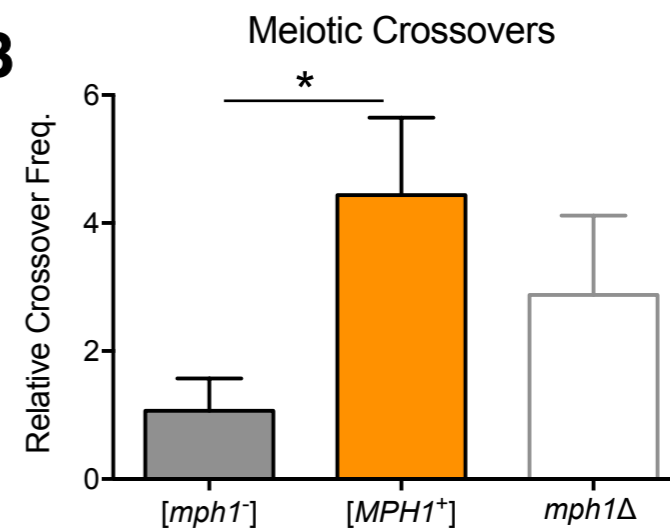

**C**

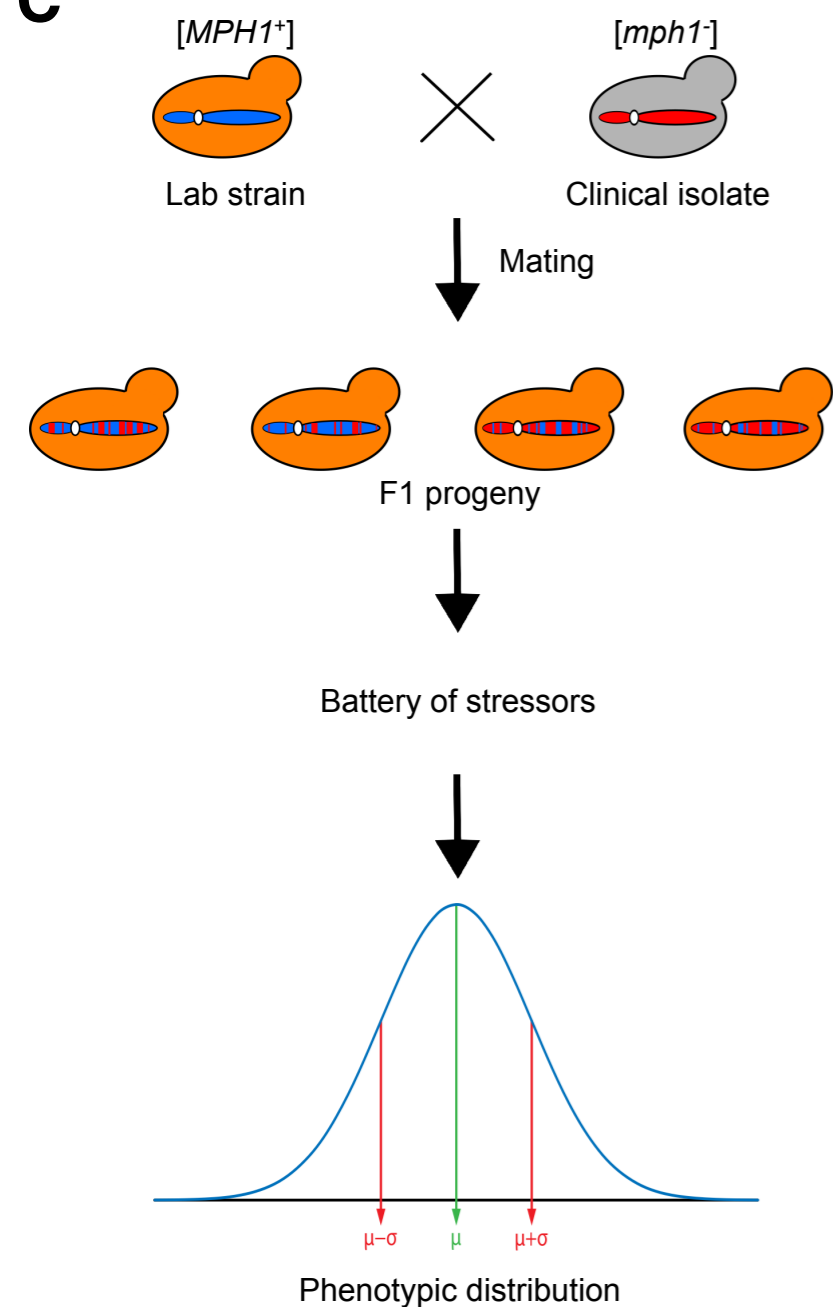

**D**

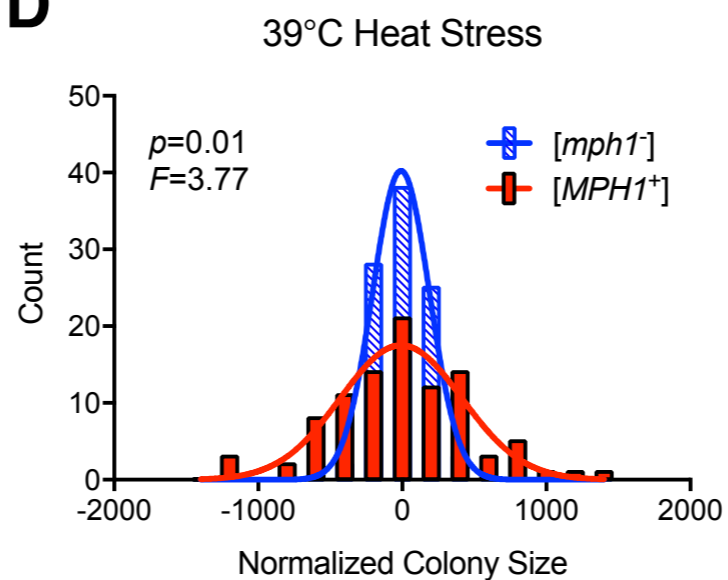

**E**

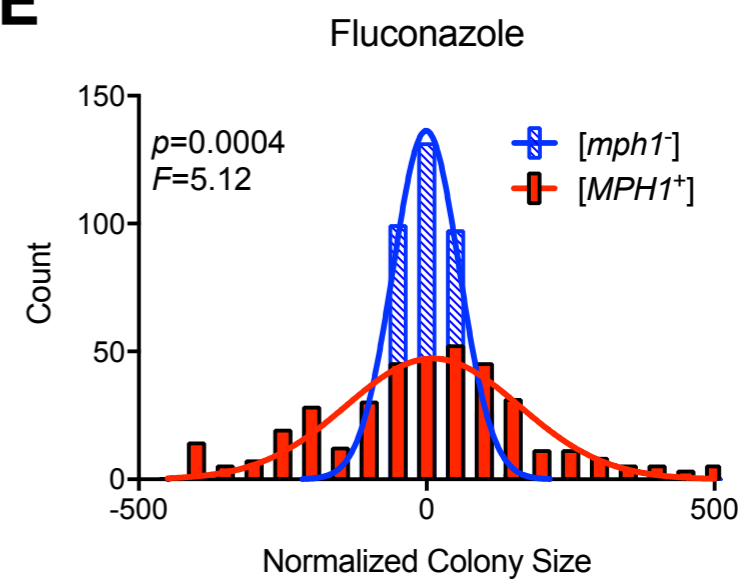

**F**

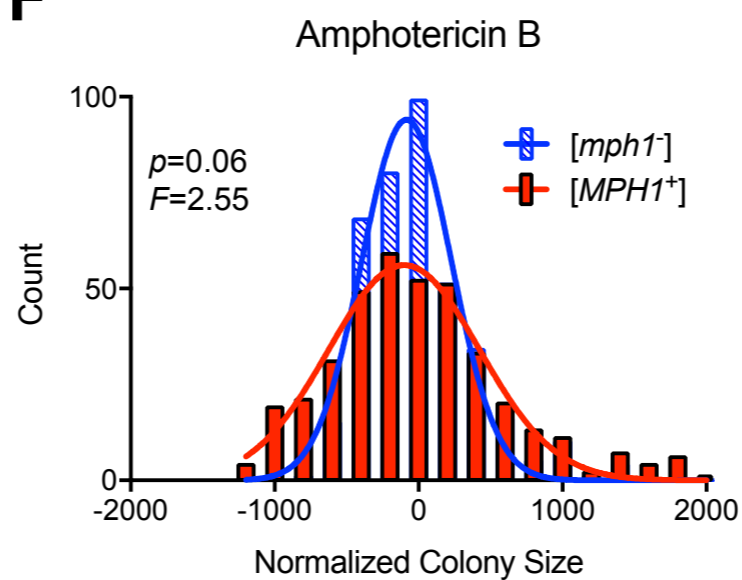

**G**

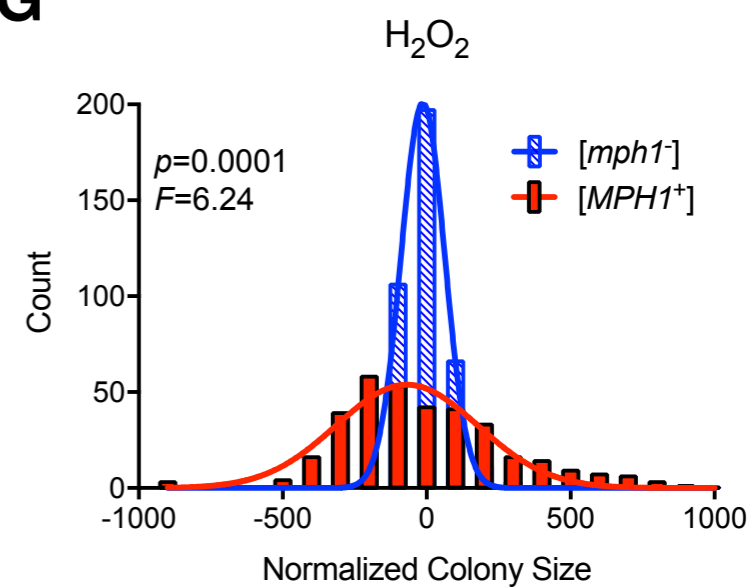

Figure S1

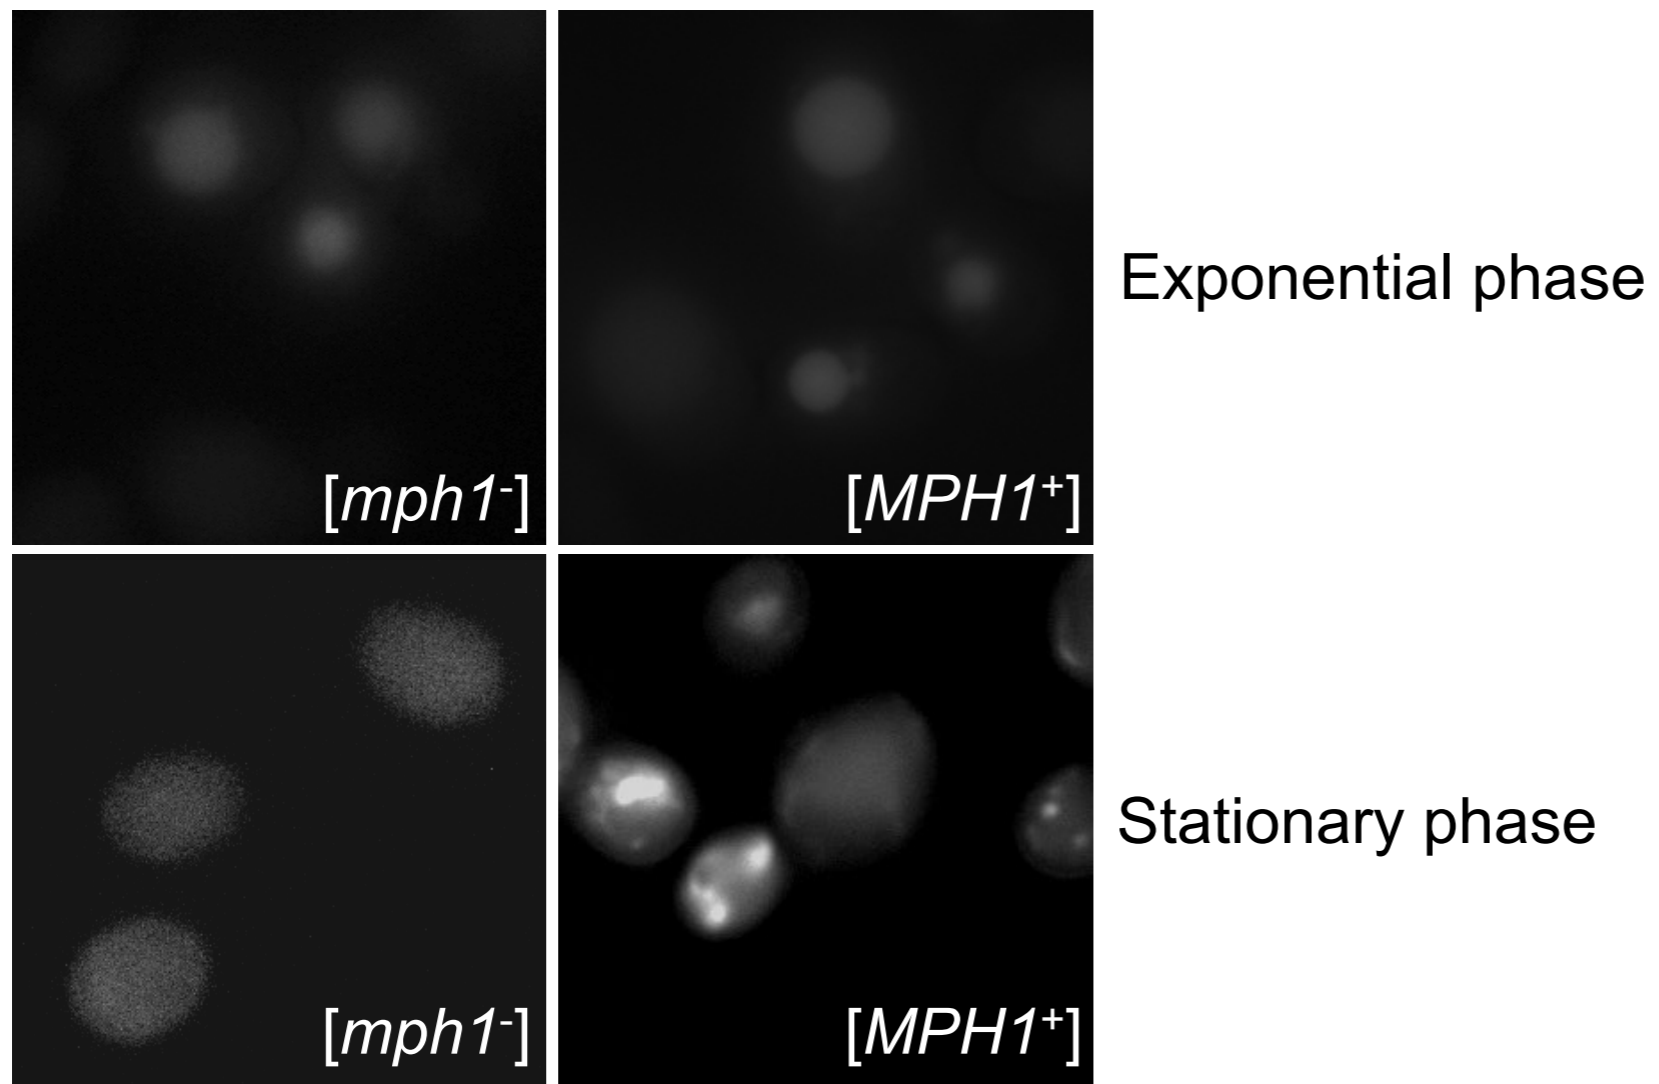

Figure S2

**A**

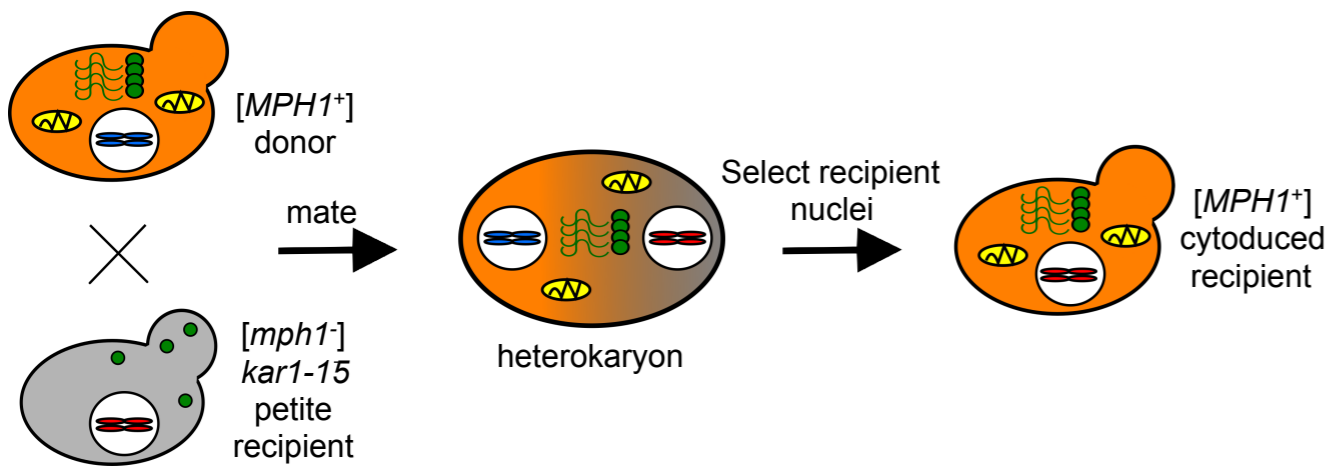

**B**

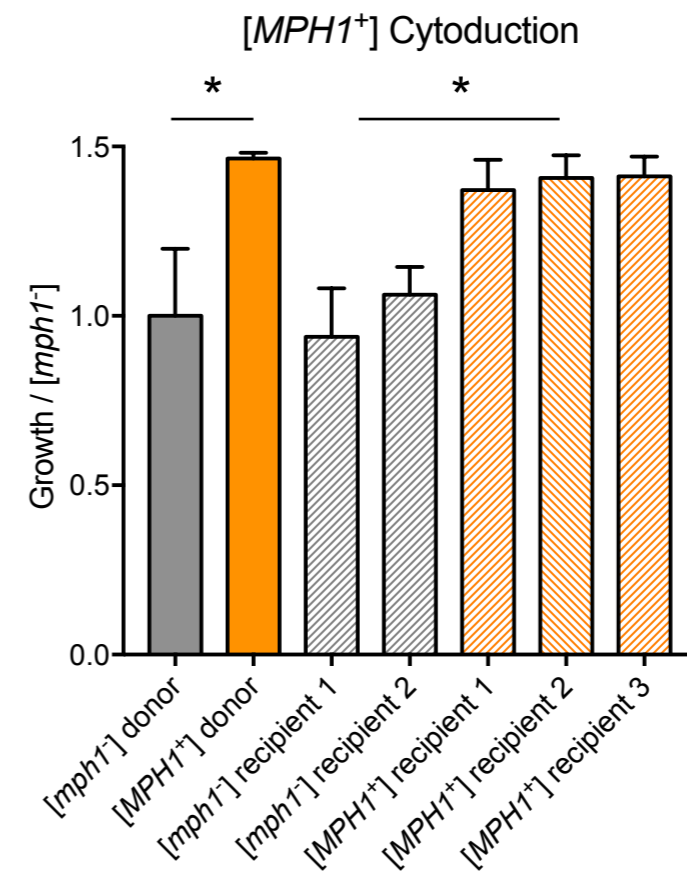

**C**

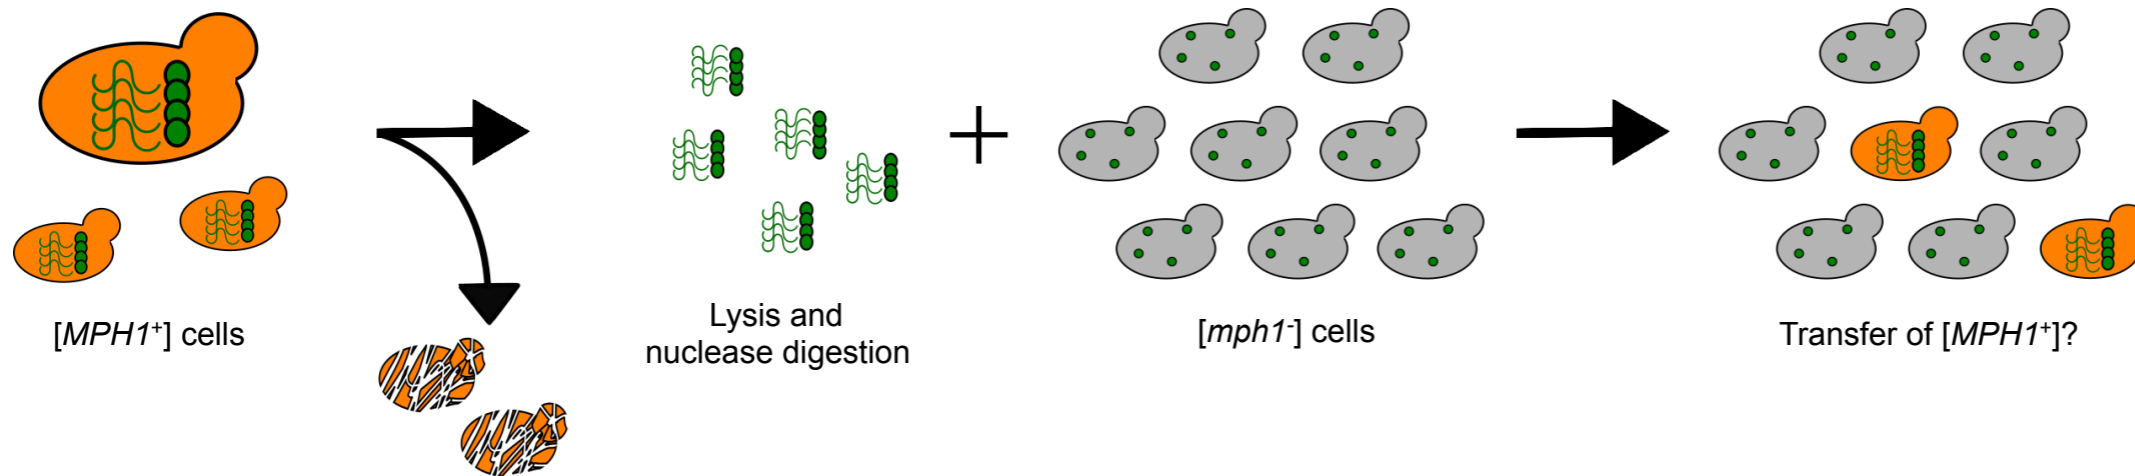



# Figure S3

## A

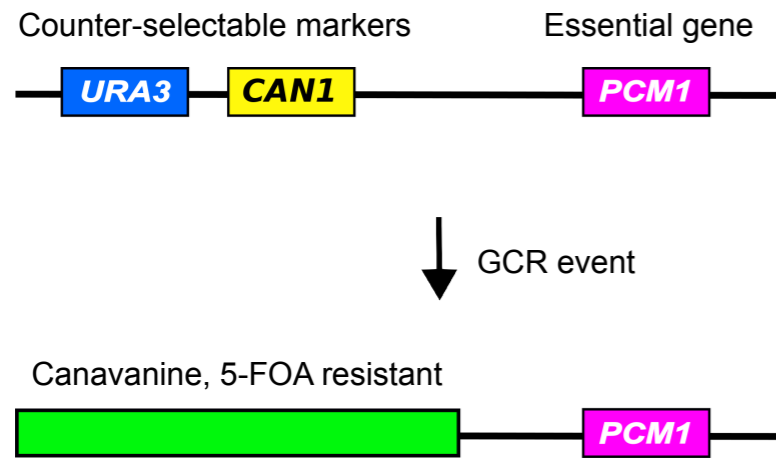

## B

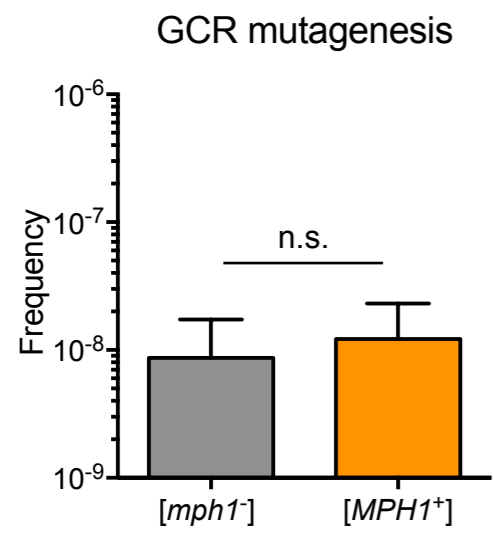

Figure S4

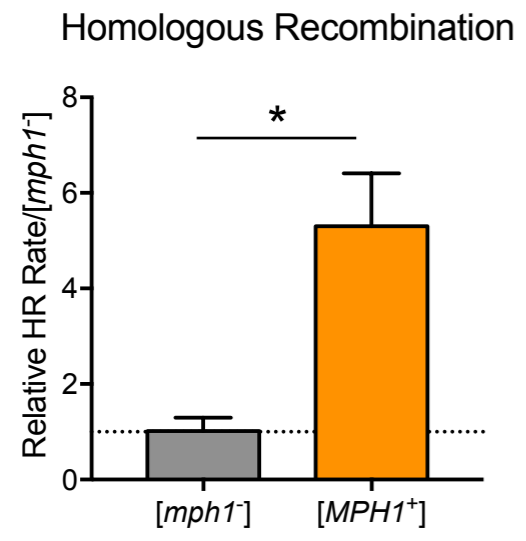

Figure S5

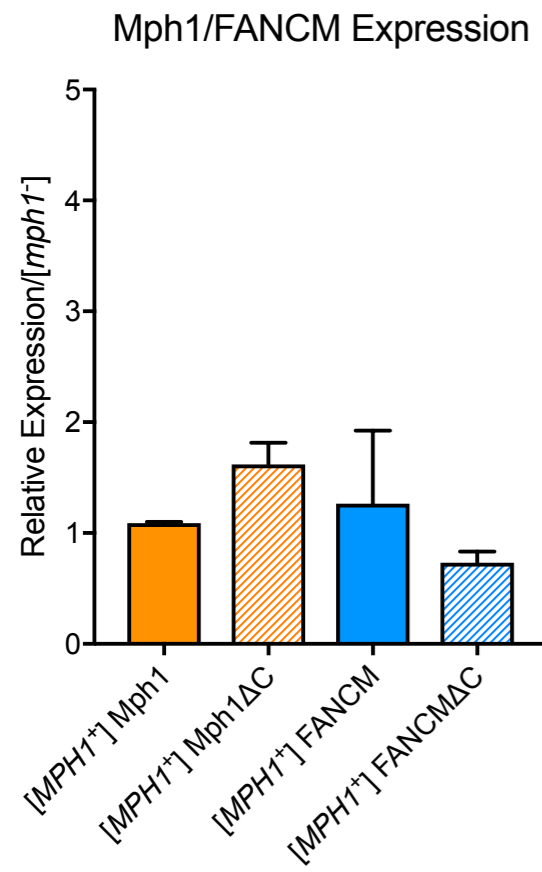

Figure S6

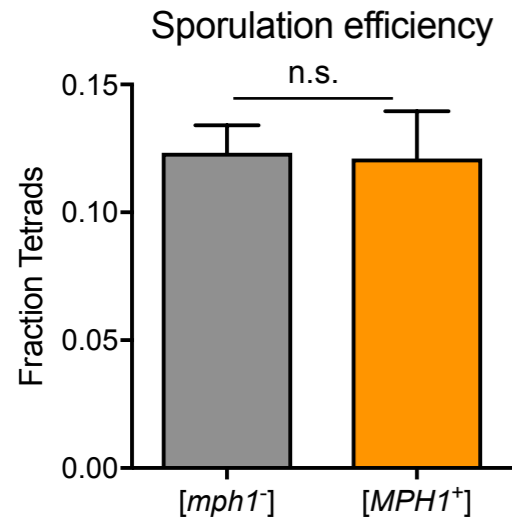

# Figure S7

## Lab parents

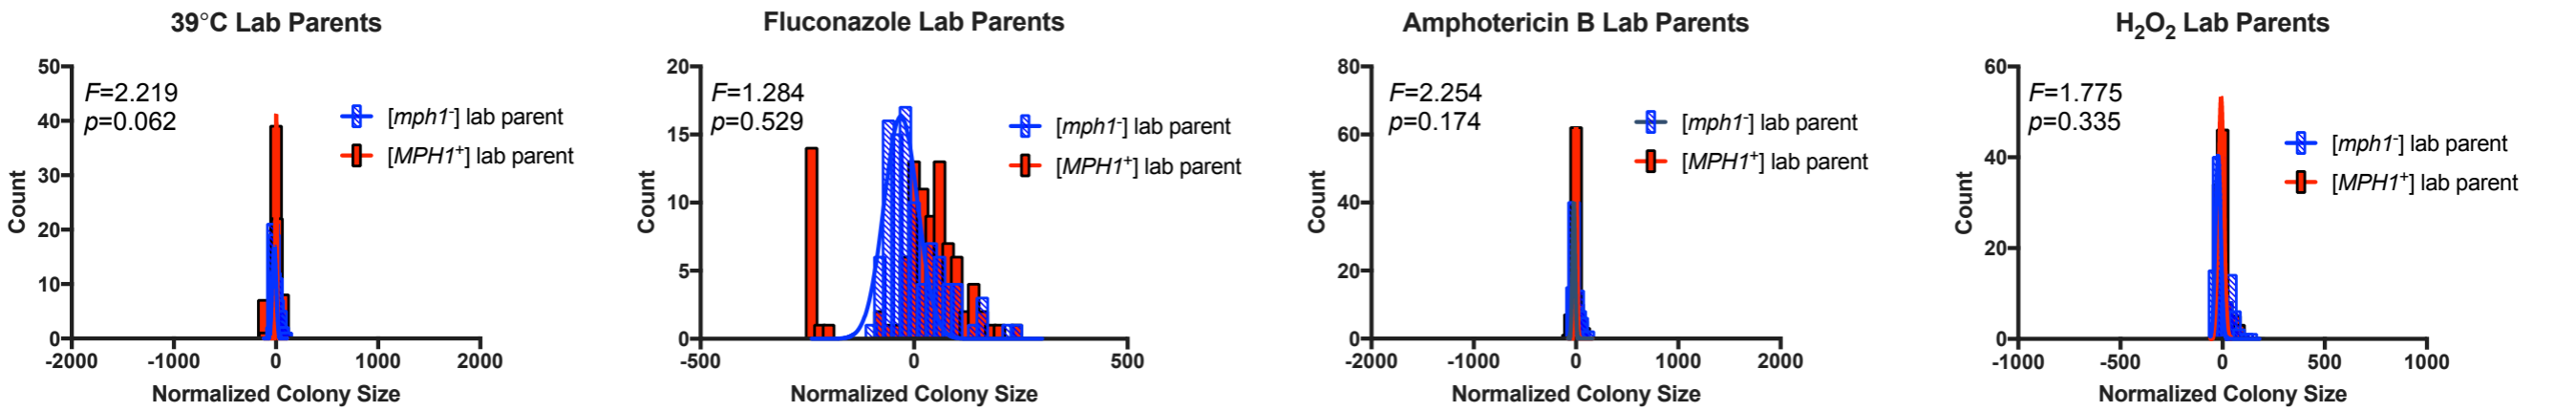

## Clinical parents

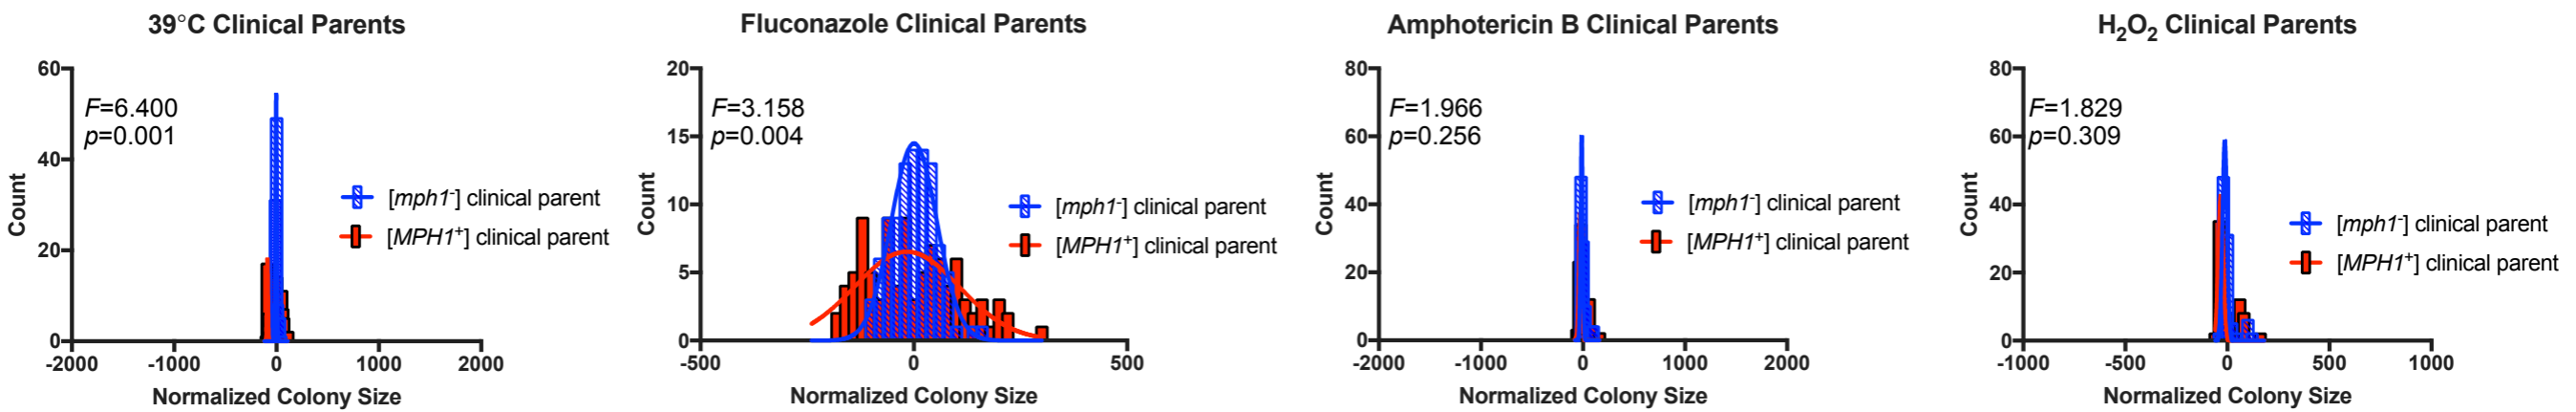

Figure S8

10-fold dilution series

[*MPH1*<sup>+</sup>]

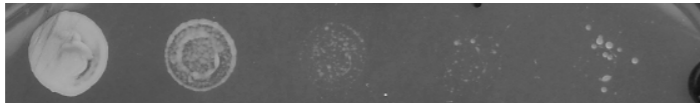

10mM  
ZnSO<sub>4</sub>

[*MPH1*<sup>+</sup>] "cured"

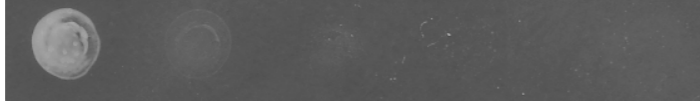

[*MPH1*<sup>+</sup>] meiotic  
progeny

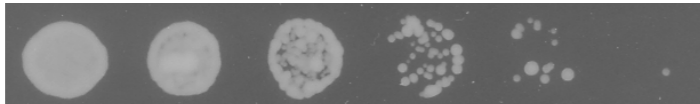

39°C  
Heat  
Stress

[*MPH1*<sup>+</sup>] meiotic  
progeny "cured"

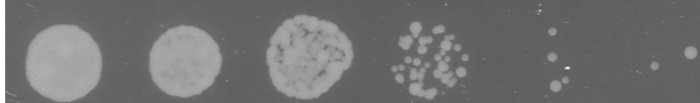

Table S1

| Strain                                   | Source                      |
|------------------------------------------|-----------------------------|
| <i>mph1-Q603D-3Flag::HIS3</i>            | Xiaolan Zhao lab (MSKCC)    |
| <i>BY4742 rad5Δ</i>                      | Yeast MATα deletion library |
| <i>BY4742 rad51Δ</i>                     | Yeast MATα deletion library |
| <i>BY4742 sgs1Δ</i>                      | Yeast MATα deletion library |
| <i>BY4742 srs2Δ</i>                      | Yeast MATα deletion library |
| <i>BY4742 mhf1Δ</i>                      | Yeast MATα deletion library |
| <i>BY4742 mhf2Δ</i>                      | Yeast MATα deletion library |
| <i>BY4742 chl1Δ</i>                      | Yeast MATα deletion library |
| <i>BY4742 exo1Δ</i>                      | Yeast MATα deletion library |
| <i>BY4742 mgm101Δ</i>                    | Yeast MATα deletion library |
| <i>BY4742 msh2Δ</i>                      | Yeast MATα deletion library |
| <i>BY4742 msh6Δ</i>                      | Yeast MATα deletion library |
| <i>BY4742 pso2Δ</i>                      | Yeast MATα deletion library |
| <i>BY4742 slx4Δ</i>                      | Yeast MATα deletion library |
| <i>BY4741 mph1Δ</i>                      | Yeast MATα deletion library |
| YJM975                                   | SGRP collection             |
| Mph1-YFP                                 | Xiaolan Zhao lab (MSKCC)    |
| <i>MDG1::K.lactisURA3</i> prion reporter | Chakrabortee et al., 2016   |

# Table S2

| Plasmid                       | Source                                                                |
|-------------------------------|-----------------------------------------------------------------------|
| pUG72                         | Euroscarf                                                             |
| 416-GPD-ccdB-eGFP             | Addgene Yeast Gateway kit                                             |
| 416-GPD-Mph1-eGFP             | Addgene Yeast Gateway kit; Yeast ORFeome collection E. coli (YSC3868) |
| 416-GPD-Mph1 $\Delta$ C-eGFP  | Addgene Yeast Gateway kit; Yeast ORFeome collection E. coli (YSC3868) |
| 416-GPD-FANCM-eGFP            | Addgene Yeast Gateway kit; FANCM from Stephen West lab                |
| 416-GPD-FANCM $\Delta$ C-eGFP | Addgene Yeast Gateway kit; GE Life Sciences Human ORFeome library     |
| Hsp70(K69M)                   | Jarosz et al., 2014b                                                  |



Table S3

| Genotype         | [ <i>mph1</i> <sup>-</sup> ] Mutation frequency | [ <i>MPH1</i> <sup>+</sup> ] Mutation frequency | Mutation fold change by genotype | Mutation fold change by prion |
|------------------|-------------------------------------------------|-------------------------------------------------|----------------------------------|-------------------------------|
| <i>wild-type</i> | 3.33(±1.31)x10 <sup>^-8</sup>                   | 8.89(±4.44)x10 <sup>^-9</sup>                   |                                  | 0.3                           |
| <i>rad5Δ</i>     | 9.16(±4.89)x10 <sup>^-7</sup>                   | 9.69(±3.98)x10 <sup>^-7</sup>                   | 27.5                             | 1.1                           |
| <i>rad51Δ</i>    | 1.99(±0.36)x10 <sup>^-6</sup>                   | 1.10(±0.25)x10 <sup>^-6</sup>                   | 59.6                             | 0.6                           |
| <i>sgs1Δ</i>     | 2.50(±0.69)x10 <sup>^-8</sup>                   | 9.28(±3.67)x10 <sup>^-8</sup>                   | 0.8                              | 3.7                           |
| <i>srs2Δ</i>     | 3.40(±1.06)x10 <sup>^-8</sup>                   | 5.67(±0.78)x10 <sup>^-8</sup>                   | 1.0                              | 1.7                           |
| <i>mhf1Δ</i>     | 1.17(±0.35)x10 <sup>^-7</sup>                   | 1.00(±0.22)x10 <sup>^-7</sup>                   | 3.5                              | 0.9                           |
| <i>mhf2Δ</i>     | 7.50(±2.17)x10 <sup>^-8</sup>                   | 3.00(±1.22)x10 <sup>^-7</sup>                   | 2.3                              | 4.0                           |
| <i>chl1Δ</i>     | 2.53(±0.37)x10 <sup>^-7</sup>                   | 4.06(±1.15)x10 <sup>^-7</sup>                   | 7.6                              | 1.6                           |
| <i>exo1Δ</i>     | 1.14(±0.13)x10 <sup>^-6</sup>                   | 1.36(±0.12)x10 <sup>^-6</sup>                   | 34.1                             | 1.2                           |
| <i>mgm101Δ</i>   | 3.62(±2.24)x10 <sup>^-7</sup>                   | 2.50(±1.52)x10 <sup>^-8</sup>                   | 10.9                             | 0.1                           |
| <i>msh2Δ</i>     | 3.18(±0.18)x10 <sup>^-6</sup>                   | 3.14(±0.19)x10 <sup>^-6</sup>                   | 95.3                             | 1.0                           |
| <i>msh6Δ</i>     | 1.73(±0.20)x10 <sup>^-6</sup>                   | 1.62(±0.09)x10 <sup>^-6</sup>                   | 51.9                             | 0.9                           |
| <i>pso2Δ</i>     | 3.89(±0.98)x10 <sup>^-7</sup>                   | 1.78(±0.04)x10 <sup>^-7</sup>                   | 11.7                             | 0.5                           |
| <i>slx4Δ</i>     | 7.92(±1.62)x10 <sup>^-8</sup>                   | 8.89(±4.76)x10 <sup>^-7</sup>                   | 2.4                              | 11.2                          |
